# Supplementary material for: Nonclinical characterization of ICVB-1042 as a selective oncolytic adenovirus for solid tumor treatment
Source: PubMed Central journal article supplement (PMC11399272; doi:10.1038/s42003-024-06839-6), 2024-09-13
Supplement: 42003_2024_6839_MOESM2_ESM.pdf [file 42003_2024_6839_MOESM2_ESM.pdf]

## Description of Additional Supplementary Files

1

2

3 **File name:** Supplementary Data 1

4 **Description:** Source data for Figure 2

5 **File name:** Supplementary Data 2

6 **Description:** Source data for Figure 3

7 **File name:** Supplementary Data 3

8 **Description:** Source data for Figure 4

9 **File name:** Supplementary Data 4

10 **Description:** Source data for Figures 5 and 6

11 **File name:** Supplementary Data 5

12 **Description:** Source data for Figure 7

13 **File name:** Supplementary Data 6

14 **Description:** Human plasma membrane and secreted proteins screened by Retrogenix™ Cell  
15 Microarray Technology (6497 features)

**File name:** Supplementary Data 7

**Description:** Source data for Supplemental Figures 2 B; 5; 6 E, H, J, L, N; 7; 8A; 9; 10; 11; 12; 14
