# Supplementary material for: Nonclinical characterization of ICVB-1042 as a selective oncolytic adenovirus for solid tumor treatment
Source: PubMed Central journal article supplement (PMC11399272; doi:10.1038/s42003-024-06839-6), 2024-09-13
Supplement: 42003_2024_6839_MOESM8_ESM.pdf [file 42003_2024_6839_MOESM8_ESM.pdf]

Human plasma membrane and secreted proteins screened by Retrogenix™ Cell  
Microarray Technology (6497 features)

**Individual proteins (6101)**

|          |          |          |           |           |           |          |          |
|----------|----------|----------|-----------|-----------|-----------|----------|----------|
| AIBG     | A2ML1    | AADA2L2  | AAK1      | AAK1      | AAMP      | ABCA1    | ABCA10   |
| ABCA12   | ABCA3    | ABCA3    | ABCA4     | ABCA7     | ABCA8     | ABCA8    | ABCB1    |
| ABCB11   | ABCB4    | ABCB4    | ABCB5     | ABCB6     | ABCC1     | ABCC10   | ABCC12   |
| ABCC2    | ABCC3    | ABCC3    | ABCC4     | ABCC4     | ABCC5     | ABCC5    | ABCC6    |
| ABCC8    | ABCC9    | ABCE1    | ABCG1     | ABCG1     | ABCG2     | ABCG2    | ABCG4    |
| ABCG5    | ABCG8    | ABHD12   | ABHD15    | ABHD17A   | ABHD17B   | ABHD18   | ABHD2    |
| ABHD6    | ABI3BP   | ABO      | ABRA      | ACE       | ACE       | ACE      | ACE      |
| ACE      | ACE2     | ACE2     | ACHE      | ACHE      | ACHE      | ACHE     | ACKR1    |
| ACKR1    | ACKR1    | ACKR2    | ACKR3     | ACKR3     | ACKR4     | ACP3     | ACP3     |
| ACP3     | ACP4     | ACP7     | ACRBP     | ACVR1     | ACVR1B    | ACVR1B   | ACVR1C   |
| ACVR1C   | ACVR1C   | ACVR2A   | ACVR2A    | ACVR2B    | ACVRL1    | ADA      | ADA2     |
| ADAM10   | ADAM11   | ADAM12   | ADAM12    | ADAM12    | ADAM12    | ADAM12   | ADAM15   |
| ADAM15   | ADAM15   | ADAM17   | ADAM18    | ADAM18    | ADAM2     | ADAM2    | ADAM20   |
| ADAM20   | ADAM21   | ADAM22   | ADAM22    | ADAM23    | ADAM23    | ADAM29   | ADAM30   |
| ADAM32   | ADAM33   | ADAM7    | ADAM7     | ADAM8     | ADAM8     | ADAM9    | ADAM9    |
| ADAMDEC1 | ADAMTS1  | ADAMTS10 | ADAMTS13  | ADAMTS15  | ADAMTS16  | ADAMTS17 | ADAMTS18 |
| ADAMTS19 | ADAMTS3  | ADAMTS4  | ADAMTS4   | ADAMTS5   | ADAMTS6   | ADAMTS8  | ADAMTS9  |
| ADAMTSL1 | ADAMTSL2 | ADAMTSL3 | ADAMTSL5  | ADCY2     | ADCY3     | ADCY4    | ADCY5    |
| ADCY6    | ADCY9    | ADCYAP1  | ADCYAP1R1 | ADCYAP1R1 | ADCYAP1R1 | ADD2     | ADGRA1   |
| ADGRA2   | ADGRA3   | ADGRB1   | ADGRB1    | ADGRB2    | ADGRB3    | ADGRD1   | ADGRD1   |
| ADGRD2   | ADGRE1   | ADGRE1   | ADGRE2    | ADGRE3    | ADGRE3    | ADGRE5   | ADGRE5   |
| ADGRE5   | ADGRE5   | ADGRF1   | ADGRF1    | ADGRF1    | ADGRF2    | ADGRF3   | ADGRF3   |
| ADGRF4   | ADGRF5   | ADGRG1   | ADGRG1    | ADGRG1    | ADGRG1    | ADGRG2   | ADGRG2   |
| ADGRG2   | ADGRG2   | ADGRG3   | ADGRG4    | ADGRG5    | ADGRG6    | ADGRG7   | ADGRL1   |
| ADGRL1   | ADGRL4   | ADGRL4   | ADIPOQ    | ADIPOQ    | ADIPOR1   | ADIPOR2  | ADM      |
| ADM2     | ADM5     | ADORA1   | ADORA2A   | ADORA2B   | ADORA3    | ADORA3   | ADPGK    |
| ADRA1A   | ADRA1A   | ADRA1B   | ADRA1D    | ADRA2A    | ADRA2B    | ADRA2C   | ADRB1    |
| ADRB2    | ADRB3    | ADTRP    | AEBP1     | AFM       | AFP       | AGER     | AGER     |
| AGER     | AGER     | AGER     | AGGF1     | AGR2      | AGRP      | AGT      | AGTR1    |
| AGTR1    | AGTR2    | AGTRAP   | AGTRAP    | AGTRAP    | AGTRAP    | AHCY     | AHSG     |
| AIF1L    | AIF1L    | AIF1L    | AIFM2     | AIG1      | AIMP1     | AJAP1    | AKR1A1   |
| AKR1B10  | ALB      | ALCAM    | ALCAM     | ALCAM     | ALCAM     | ALG10    | ALG10B   |
| ALK      | ALKAL1   | ALKAL2   | ALOX12    | ALPG      | ALPI      | ALPL     | ALPL     |
| ALPP     | AMBN     | AMBP     | AMBP      | AMELX     | AMELY     | AMH      | AMHR2    |
| AMIGO1   | AMIGO2   | AMIGO3   | AMN       | AMTN      | AMTN      | AMY1A    | AMY2A    |
| AMY2B    | ANG      | ANGPT1   | ANGPT1    | ANGPT1    | ANGPT2    | ANGPT2   | ANGPT2   |
| ANGPT2   | ANGPT4   | ANGPTL2  | ANGPTL3   | ANGPTL4   | ANGPTL5   | ANGPTL6  | ANGPTL7  |
| ANGPTL8  | ANKH     | ANKS1B   | ANO1      | ANO10     | ANO10     | ANO2     | ANO2     |
| ANO3     | ANO4     | ANO4     | ANO5      | ANO6      | ANO7      | ANO9     | ANOS1    |
| ANOS1    | ANPEP    | ANTXR1   | ANTXR1    | ANTXR1    | ANTXR2    | ANTXR2   | ANTXR2L  |
| ANXA1    | ANXA1    | ANXA13   | ANXA13    | ANXA2     | ANXA2     | ANXA2    | ANXA2P2  |

| ANXA3    | ANXA5    | ANXA6    | ANXA7    | ANXA9    | AOAH     | AOC1     | AOC2     |
|----------|----------|----------|----------|----------|----------|----------|----------|
| AOC3     | AOC3     | AP2A2    | APBB1    | APCDD1   | APCS     | APELA    | APH1B    |
| APH1B    | APLN     | APLNR    | APLP1    | APLP1    | APLP2    | APLP2    | APLP2    |
| APMAP    | APMAP    | APMAP    | APOA1    | APOA1    | APOA2    | APOA4    | APOA5    |
| APOC1    | APOC1    | APOC2    | APOC3    | APOC4    | APOD     | APOE     | APOE     |
| APOF     | APOH     | APOH     | APOL1    | APOL1    | APOL4    | APOL4    | APOLD1   |
| APOM     | APOM     | APOO     | APP      | APP      | APP      | AQP1     | AQP1     |
| AQP1     | AQP1     | AQP10    | AQP11    | AQP2     | AQP3     | AQP4     | AQP5     |
| AQP6     | AQP7     | AQP7     | AQP7P3   | AQP8     | AQP8     | AQP9     | ARC      |
| ARHGAP17 | ARHGEF1  | ARHGEF2  | ARL6IP5  | ARMH4    | ARSF     | ARSF     | ARSI     |
| ARSJ     | ARSK     | ART3     | ART3     | ART4     | ART5     | ARTN     | ASAH1    |
| ASAH2    | ASAH2    | ASAH2    | ASGR1    | ASGR1    | ASGR2    | ASGR2    | ASIC1    |
| ASIC1    | ASIC2    | ASIC2    | ASIC3    | ASIC3    | ASIC4    | ASIC5    | ASIP     |
| ASPN     | ASPRV1   | ASTN1    | ATP10D   | ATP10D   | ATP11A   | ATP11B   | ATP11C   |
| ATP13A1  | ATP13A1  | ATP13A2  | ATP13A4  | ATP1A1   | ATP1A2   | ATP1A3   | ATP1A4   |
| ATP1A4   | ATP1A4   | ATP1B1   | ATP1B2   | ATP1B3   | ATP2B2   | ATP2B3   | ATP2B4   |
| ATP2C2   | ATP4A    | ATP4B    | ATP5F1A  | ATP6AP2  | ATP6V0A2 | ATP6V0A4 | ATP6V0E1 |
| ATP7B    | ATP9A    | ATP9B    | ATRAID   | ATRAID   | ATRAID   | ATRAID   | ATRN     |
| ATRN     | ATRNL1   | ATRNL1   | ATRNL1   | AVP      | AVPR1A   | AVPR1B   | AVPR2    |
| AVPR2    | AXL      | AZGP1    | AZGP1    | B2M      | B2M      | B3GAT1   | B4GALT1  |
| B4GALT1  | B4GAT1   | BACE1    | BACE1    | BACE1    | BACE1    | BACE2    | BACE2    |
| BACE2    | BAG6     | BAGE     | BAGE2    | BAGE3    | BAGE4    | BAGE5    | BAIAP2L2 |
| BAMBI    | BASP1    | BCAM     | BCAN     | BCAN     | BCAN     | BCHE     | BCHE     |
| BDKRB1   | BDKRB1   | BDKRB2   | BDNF     | BDNF     | BEAN1    | BEST1    | BEST1    |
| BEST1    | BEST2    | BEST3    | BEST3    | BEST4    | BGLAP    | BGN      | BLK      |
| BMP1     | BMP10    | BMP10    | BMP15    | BMP2     | BMP3     | BMP4     | BMP5     |
| BMP6     | BMP7     | BMP8A    | BMP8B    | BMPER    | BMPR1A   | BMPR1B   | BMPR2    |
| BOC      | BOC      | BPI      | BPI      | BPIFA1   | BPIFA2   | BPIFA3   | BPIFB1   |
| BPIFB2   | BPIFB3   | BPIFB4   | BPIFB6   | BPIFC    | BRICD5   | BRICD5   | BRINP2   |
| BRINP3   | BRS3     | BSG      | BSG      | BSG      | BSND     | BSPH1    | BST1     |
| BST2     | BTBD17   | BTC      | BTC      | BTD      | BTLA     | BTLA     | BTLA     |
| BTN1A1   | BTN1A1   | BTN2A1   | BTN2A1   | BTN2A1   | BTN2A2   | BTN2A2   | BTN2A2   |
| BTN2A2   | BTN2A2   | BTN3A1   | BTN3A1   | BTN3A2   | BTN3A2   | BTN3A2   | BTN3A3   |
| BTN3A3   | BTNL2    | BTNL3    | BTNL8    | BTNL8    | BTNL9    | BTNL9    | BVES     |
| C10orf25 | C11orf24 | C11orf44 | C11orf45 | C11orf87 | C11orf94 | C12orf49 | C12orf73 |
| C14orf93 | C15orf61 | C16orf89 | C16orf89 | C16orf89 | C17orf67 | C17orf77 | C17orf80 |
| C17orf80 | C17orf99 | C19orf18 | C1orf210 | C1orf54  | C1QA     | C1QB     | C1QBP    |
| C1QBP    | C1QC     | C1QL1    | C1QL2    | C1QL3    | C1QL4    | C1QTNF1  | C1QTNF12 |
| C1QTNF2  | C1QTNF3  | C1QTNF4  | C1QTNF5  | C1QTNF6  | C1QTNF7  | C1QTNF8  | C1QTNF9  |
| C1QTNF9B | C1R      | C1RL     | C1S      | C2       | C22orf46 | C2orf66  | C2orf69  |
| C3       | C3AR1    | C3AR1    | C4BPA    | C4BPB    | C4orf48  | C5AR1    | C5AR1    |
| C5AR2    | C5orf38  | C5orf46  | C5orf64  | C6       | C6       | C6orf120 | C6orf15  |
| C6orf89  | C7       | C7       | C7orf69  | C8A      | C8A      | C8B      | C8B      |
| C8G      | C8G      | C8G      | C9       | C9       | C9orf135 | C9orf47  | C9orf72  |
| CA11     | CA11     | CA12     | CA12     | CA12     | CA14     | CA2      | CA4      |

|          |          |          |          |          |          |          |          |
|----------|----------|----------|----------|----------|----------|----------|----------|
| CA6      | CA9      | CABP1    | CABP1    | CABP2    | CABP7    | CACHD1   | CACNA1A  |
| CACNA1C  | CACNA1G  | CACNA1S  | CACNA2D1 | CACNA2D2 | CACNA2D2 | CACNA2D2 | CACNA2D3 |
| CACNA2D4 | CACNA2D4 | CACNB1   | CACNB1   | CACNB1   | CACNB3   | CACNB4   | CACNG1   |
| CACNG2   | CACNG3   | CACNG4   | CACNG5   | CACNG5   | CACNG6   | CACNG7   | CACNG8   |
| CADM1    | CADM1    | CADM2    | CADM3    | CADM3    | CADM4    | CALCA    | CALCB    |
| CALCR    | CALCR    | CALCRL   | CALHM1   | CALHM3   | CALHM4   | CALHM6   | CALN1    |
| CALR     | CALR     | CALU     | CALY     | CAMK1G   | CAMK2A   | CAMK2D   | CAMK2G   |
| CAMK2N1  | CAMLG    | CAMP     | CANT1    | CANT1    | CANT1    | CAPG     | CAPN1    |
| CAPN10   | CARTPT   | CASP4    | CASR     | CATSPER1 | CATSPER2 | CATSPER2 | CATSPER2 |
| CATSPER3 | CATSPER4 | CATSPERD | CATSPERE | CATSPERE | CATSPERG | CATSPERG | CBARP    |
| CBLIF    | CBLIF    | CBLN1    | CBLN1    | CBLN2    | CBLN3    | CBLN3    | CBLN4    |
| CBLN4    | CCBE1    | CCDC126  | CCDC134  | CCDC3    | CCDC70   | CCDC70   | CCDC80   |
| CCER2    | CCK      | CCKAR    | CCKBR    | CCKBR    | CCL1     | CCL1     | CCL11    |
| CCL13    | CCL14    | CCL14    | CCL15    | CCL16    | CCL17    | CCL18    | CCL19    |
| CCL2     | CCL20    | CCL21    | CCL22    | CCL23    | CCL24    | CCL25    | CCL26    |
| CCL27    | CCL28    | CCL3     | CCL3L1   | CCL3L1   | CCL4     | CCL4L1   | CCL5     |
| CCL7     | CCL8     | CCN1     | CCN1     | CCN2     | CCN2     | CCN3     | CCN4     |
| CCN5     | CCN6     | CCNYL1   | CCR1     | CCR1     | CCR10    | CCR10    | CCR2     |
| CCR3     | CCR4     | CCR5     | CCR6     | CCR6     | CCR7     | CCR7     | CCR8     |
| CCR9     | CCR9     | CCR9     | CCRL2    | CCRL2    | CCRL2    | CCSMST1  | CD101    |
| CD109    | CD14     | CD14     | CD151    | CD160    | CD163    | CD163    | CD163L1  |
| CD164    | CD164    | CD164L2  | CD177    | CD177    | CD180    | CD19     | CD19     |
| CD1A     | CD1A     | CD1B     | CD1C     | CD1D     | CD1E     | CD2      | CD200    |
| CD200    | CD200    | CD200R1  | CD200R1  | CD200R1  | CD200R1  | CD200R1L | CD207    |
| CD209    | CD209    | CD209    | CD22     | CD22     | CD22     | CD226    | CD24     |
| CD244    | CD244    | CD247    | CD247    | CD248    | CD27     | CD274    | CD274    |
| CD276    | CD276    | CD28     | CD300A   | CD300C   | CD300E   | CD300H   | CD300H   |
| CD300LB  | CD300LB  | CD300LD  | CD300LF  | CD300LF  | CD300LG  | CD302    | CD302    |
| CD320    | CD320    | CD33     | CD33     | CD34     | CD36     | CD37     | CD38     |
| CD3D     | CD3E     | CD3G     | CD4      | CD4      | CD40     | CD40     | CD40     |
| CD40     | CD40LG   | CD40LG   | CD44     | CD44     | CD44     | CD44     | CD46     |
| CD46     | CD46     | CD47     | CD47     | CD47     | CD48     | CD5      | CD52     |
| CD53     | CD55     | CD55     | CD58     | CD58     | CD59     | CD59     | CD5L     |
| CD5L     | CD6      | CD6      | CD6      | CD63     | CD63     | CD68     | CD69     |
| CD7      | CD7      | CD70     | CD70     | CD72     | CD74     | CD74     | CD74     |
| CD79A    | CD79B    | CD80     | CD81     | CD82     | CD83     | CD84     | CD84     |
| CD86     | CD86     | CD8A     | CD8A     | CD8A     | CD8B     | CD8B     | CD8B     |
| CD8B     | CD8B     | CD8B     | CD8B2    | CD8B2    | CD9      | CD93     | CD96     |
| CD96     | CD96     | CD99     | CD99L2   | CD99L2   | CD99L2   | CD99L2   | CDCP1    |
| CDCP1    | CDCP1    | CDCP2    | CDH1     | CDH10    | CDH11    | CDH12    | CDH13    |
| CDH15    | CDH16    | CDH16    | CDH17    | CDH18    | CDH18    | CDH19    | CDH2     |
| CDH2     | CDH20    | CDH22    | CDH23    | CDH24    | CDH26    | CDH3     | CDH4     |
| CDH5     | CDH6     | CDH6     | CDH7     | CDH7     | CDH8     | CDH9     | CDHR1    |
| CDHR1    | CDHR1    | CDHR2    | CDHR3    | CDHR4    | CDHR4    | CDHR5    | CDIPT    |
| CDFNF    | CDON     | CDSN     | CDSN     | CEACAM1  | CEACAM1  | CEACAM1  | CEACAM1  |



|                    |                    |                    |          |          |          |          |          |
|--------------------|--------------------|--------------------|----------|----------|----------|----------|----------|
| CSF1R              | CSF2               | CSF2RA             | CSF2RA   | CSF2RA   | CSF2RA   | CSF2RA   | CSF2RB   |
| CSF2RB             | CSF3               | CSF3R              | CSF3R    | CSF3R    | CSH1     | CSH2     | CSHL1    |
| CSMD2              | CSN1S1             | CSN2               | CSN3     | CSNK2B   | CSPG4    | CSPG5    | CSPG5    |
| CSPG5              | CST1               | CST11              | CST2     | CST3     | CST4     | CST5     | CST6     |
| CST7               | CST8               | CST9               | CST9L    | CSTL1    | CT83     | CTF1     | CTHRC1   |
| CTLA4              | CTNNA1             | CTNNB1             | CTNS     | CTRB1    | CTRB2    | CTSB     | CTSB     |
| CTSD               | CTSG               | CTSK               | CTSS     | CUTA     | CUZD1    | CX3CL1   | CX3CL1   |
| CX3CL1             | CX3CR1             | CX3CR1             | CXADR    | CXADR    | CXCL1    | CXCL10   | CXCL11   |
| CXCL12             | CXCL13             | CXCL14             | CXCL16   | CXCL16   | CXCL16   | CXCL17   | CXCL2    |
| CXCL3              | CXCL5              | CXCL6              | CXCL8    | CXCL9    | CXCR1    | CXCR1    | CXCR2    |
| CXCR2              | CXCR3              | CXCR3              | CXCR4    | CXCR4    | CXCR5    | CXCR5    | CXCR6    |
| CXCR6              | CXorf66            | CYB5D2             | CYBA     | CYBB     | CYBRD1   | CYSLTR1  | CYSLTR1  |
| CYSLTR2            | CYTH1              | CYTL1              | CYYR1    | DAG1     | DAG1     | DAGLA    | DAGLB    |
| DAND5              | DAPP1              | DBH                | DCBLD1   | DCBLD2   | DCC      | DCD      | DCHS1    |
| DCLK1              | DCN                | DCST1              | DCST2    | DCSTAMP  | DDR1     | DDR1     | DDR2     |
| DEAF1              | DEFA1              | DEFA3              | DEFA3    | DEFA4    | DEFA5    | DEFA6    | DEFB1    |
| DEFB103A; DEFB103B | DEFB104A; DEFB104B | DEFB105A; DEFB105B | DEFB106A | DEFB106B | DEFB107A | DEFB107B | DEFB108B |
| DEFB108B           | DEFB110            | DEFB110            | DEFB112  | DEFB112  | DEFB113  | DEFB113  | DEFB114  |
| DEFB115            | DEFB115            | DEFB116            | DEFB116  | DEFB118  | DEFB119  | DEFB121  | DEFB123  |
| DEFB124            | DEFB124            | DEFB125            | DEFB126  | DEFB127  | DEFB128  | DEFB129  | DEFB130A |
| DEFB131A           | DEFB131B           | DEFB132            | DEFB133  | DEFB134  | DEFB135  | DEFB135  | DEFB136  |
| DEFB136            | DEFB4A             | DES                | DGCR2    | DGKB     | DHH      | DHH      | DHRS11   |
| DHRS13             | DHRS4L2            | DHRS7B             | DHRS7C   | DHRSX    | DIO3     | DIO3     | DIPK2A   |
| DIPK2B             | DIRAS1             | DIRAS2             | DIRAS3   | DISP1    | DKK1     | DKK1     | DKK2     |
| DKK3               | DKK4               | DKKL1              | DLG2     | DLG3     | DLG4     | DLK1     | DLK2     |
| DLK2               | DLL1               | DLL3               | DLL3     | DLL4     | DMD      | DMKN     | DMP1     |
| DNAJB4             | DNAJC16            | DNASE1             | DNASE1L2 | DNASE1L3 | DNER     | DPEP1    | DPEP2    |
| DPEP2              | DPP10              | DPP4               | DPP4     | DPP6     | DPP7     | DPT      | DRAM2    |
| DRAXIN             | DRD1               | DRD2               | DRD2     | DRD3     | DRD4     | DRD5     | DSC1     |
| DSC2               | DSC3               | DSCAM              | DSCAML1  | DSG1     | DSG2     | DSG3     | DSG4     |
| DUOX1              | DUOX2              | DUOXA1             | DUOXA1   | DUOXA2   | DUSP15   | DYNAP    | DYSF     |
| EBAG9              | EBI3               | EBI3               | ECE1     | ECM1     | ECM2     | ECRG4    | ECSCR    |
| EDA                | EDA                | EDA                | EDA      | EDA      | EDA2R    | EDAR     | EDDM13   |
| EDDM3A             | EDDM3B             | EDIL3              | EDN1     | EDN2     | EDN3     | EDNRA    | EDNRB    |
| EFEMP1             | EFEMP2             | EFNA1              | EFNA2    | EFNA3    | EFNA4    | EFNA5    | EFNB1    |
| EFNB2              | EFNB3              | EFR3A              | EGF      | EGFL6    | EGFL7    | EGFL8    | EGFLAM   |
| EGFLAM             | EGFR               | EGFR               | EGFR     | EGFR     | EGFR     | ELAPOR1  | ELAPOR1  |
| ELAPOR1            | ELAPOR2            | ELFN1              | ELN      | ELSPBP1  | EMB      | EMC1     | EMC10    |
| EMC10              | EMC7               | EMCN               | EMCN     | EMID1    | EMILIN1  | EMILIN2  | EMILIN3  |
| EMP1               | EMP2               | EMP2               | ENAM     | ENDOD1   | ENDOU    | ENG      | ENHO     |
| ENO1               | ENO2               | ENOX1              | ENOX1    | ENOX2    | ENOX2    | ENPEP    | ENPP1    |
| ENPP1              | ENPP1              | ENPP2              | ENPP2    | ENPP3    | ENPP3    | ENPP4    | ENPP5    |
| ENPP5              | ENPP6              | ENPP7              | ENTPD1   | ENTPD1   | ENTPD2   | ENTPD3   | ENTPD3   |
| ENTPD5             | ENTPD6             | ENTPD8             | ENTPD8   | EPB41L2  | EPB41L3  | EPB41L3  | EPB41L5  |
| EPCAM              | EPDR1              | EPDR1              | EPGN     | EPGN     | EPGN     | EPHA1    | EPHA10   |

|         |         |         |         |          |          |            |            |
|---------|---------|---------|---------|----------|----------|------------|------------|
| EPHA10  | EPHA10  | EPHA2   | EPHA3   | EPHA3    | EPHA3    | EPHA4      | EPHA4      |
| EPHA5   | EPHA6   | EPHA7   | EPHA7   | EPHA8    | EPHA8    | EPHB1      | EPHB2      |
| EPHB2   | EPHB3   | EPHB4   | EPHB6   | EPHX4    | EPO      | EPOR       | EPPIN      |
| EPYC    | ERAS    | ERBB2   | ERBB3   | ERBB3    | ERBB3    | ERBB3      | ERBB4      |
| ERBB4   | EREG    | ERFE    | ERMAP   | ERVFRD-1 | ERVH48-1 | ERVMER34-1 | ERVMER34-1 |
| ERVV-1  | ERVV-2  | ERVW-1  | ESAM    | ESM1     | ESR1     | ESYT3      | EVA1C      |
| EVA1C   | EVC     | EVC2    | EVI2A   | EVI2A    | EVI2A    | EVI2B      | EXTL2      |
| EXTL2   | F10     | F10     | F10     | F11      | F11      | F11R       | F12        |
| F12     | F13A1   | F13B    | F2      | F2       | F2R      | F2R        | F2RL1      |
| F2RL1   | F2RL2   | F2RL3   | F3      | F3       | F5       | F5         | F5         |
| F5      | F7      | F7      | F8      | F8       | F9       | F9         | FABP5      |
| FADS2   | FAIM2   | FAM168B | FAM168B | FAM171A1 | FAM171A2 | FAM171B    | FAM171B    |
| FAM172A | FAM174A | FAM174B | FAM180A | FAM180B  | FAM187B  | FAM187B    | FAM200A    |
| FAM209A | FAM209B | FAM20A  | FAM20C  | FAM234A  | FAM24A   | FAM24B     | FAM3A      |
| FAM3B   | FAM3D   | FAM3D   | FAP     | FAP      | FAS      | FAS        | FAS        |
| FAS     | FAS     | FAS     | FAS     | FASLG    | FASLG    | FBLN1      | FBLN2      |
| FBLN5   | FBLN7   | FBN3    | FCAMR   | FCAR     | FCAR     | FCAR       | FCAR       |
| FCAR    | FCAR    | FCAR    | FCAR    | FCAR     | FCER1A   | FCER1G     | FCER1G     |
| FCER2   | FCER2   | FCGR1A  | FCGR1B  | FCGR1B   | FCGR2A   | FCGR2A     | FCGR2B     |
| FCGR2B  | FCGR2C  | FCGR3A  | FCGR3A  | FCGR3A   | FCGR3B   | FCGR3B     | FCGRT      |
| FCMR    | FCMR    | FCMR    | FCN1    | FCN1     | FCN2     | FCN3       | FCRL1      |
| FCRL2   | FCRL2   | FCRL2   | FCRL3   | FCRL3    | FCRL4    | FCRL5      | FCRL6      |
| FCRLA   | FDCSP   | FETUB   | FFAR1   | FFAR2    | FFAR3    | FFAR4      | FGA        |
| FGA     | FGB     | FGB     | FGF1    | FGF10    | FGF10    | FGF16      | FGF17      |
| FGF18   | FGF18   | FGF19   | FGF2    | FGF20    | FGF21    | FGF22      | FGF23      |
| FGF3    | FGF4    | FGF5    | FGF6    | FGF6     | FGF7     | FGF8       | FGF9       |
| FGFBP1  | FGFBP1  | FGFBP2  | FGFBP3  | FGFR1    | FGFR1    | FGFR1      | FGFR1      |
| FGFR1   | FGFR2   | FGFR2   | FGFR3   | FGFR3    | FGFR3    | FGFR4      | FGFR4      |
| FGFRL1  | FGG     | FGG     | FGL1    | FGL2     | FIBCD1   | FIBIN      | FITM1      |
| FITM2   | FJX1    | FKRP    | FLNB    | FLOT1    | FLRT1    | FLRT1      | FLRT1      |
| FLRT1   | FLRT2   | FLRT2   | FLRT3   | FLRT3    | FLRT3    | FLT1       | FLT1       |
| FLT1    | FLT3    | FLT3LG  | FLT4    | FLVCR1   | FLVCR2   | FMO5       | FMOD       |
| FMR1NB  | FN1     | FNDC10  | FNDC4   | FNDC4    | FNDC5    | FNDC5      | FNDC5      |
| FNDC5   | FNDC5   | FNDC7   | FOLH1   | FOLH1    | FOLH1    | FOLR1      | FOLR1      |
| FOLR2   | FOLR2   | FOLR3   | FPR1    | FPR2     | FPR2     | FPR3       | FRRS1L     |
| FRZB    | FRZB    | FSHB    | FSHR    | FST      | FSTL1    | FSTL3      | FSTL4      |
| FSTL5   | FUCA2   | FURIN   | FURIN   | FUT6     | FXYD1    | FXYD2      | FXYD3      |
| FXYD4   | FXYD5   | FXYD6   | FXYD6   | FXYD7    | FZD1     | FZD10      | FZD2       |
| FZD3    | FZD4    | FZD5    | FZD6    | FZD7     | FZD8     | FZD9       | GABBR1     |
| GABBR1  | GABBR1  | GABBR1  | GABBR2  | GABBR2   | GABRA1   | GABRA2     | GABRA3     |
| GABRA4  | GABRA5  | GABRA5  | GABRA6  | GABRB1   | GABRB2   | GABRB2     | GABRB3     |
| GABRB3  | GABRD   | GABRE   | GABRE   | GABRG1   | GABRG2   | GABRG3     | GABRP      |
| GABRQ   | GABRR1  | GABRR1  | GABRR1  | GABRR2   | GABRR3   | GAD2       | GAL        |
| GALNT1  | GALNT2  | GALNT2  | GALP    | GALP     | GALR1    | GALR2      | GALR3      |
| GAPT    | GARS1   | GAS1    | GAS6    | GASK1A   | GAST     | GAST       | GATD1      |

|          |         |         |        |        |        |          |          |
|----------|---------|---------|--------|--------|--------|----------|----------|
| GBP1     | GBP1    | GBP1    | GC     | GC     | GCG    | GCG      | GCCR     |
| GCNT7    | GDE1    | GDF1    | GDF10  | GDF11  | GDF15  | GDF2     | GDF2     |
| GDF3     | GDF5    | GDF6    | GDF7   | GDF9   | GDNF   | GDPD1    | GDPD1    |
| GDPD2    | GDPD3   | GDPD4   | GDPD5  | GDPD5  | GFER   | GFOD1    | GFOD2    |
| GFRA1    | GFRA1   | GFRA2   | GFRA3  | GFRA4  | GFRA4  | GFRA4    | GFRAL    |
| GGH      | GGH     | GGT1    | GGT1   | GGT2   | GGT5   | GGT5     | GGT5     |
| GGT6     | GGT7    | GGTLC1  | GGTLC2 | GH1    | GH2    | GHR      | GHRH     |
| GHRHR    | GHRL    | GHSR    | GHSR   | GHSR   | GINM1  | GIP      | GIPR     |
| GJA1     | GJA10   | GJA3    | GJA3   | GJA4   | GJA5   | GJA8     | GJA9     |
| GJB1     | GJB2    | GJB3    | GJB4   | GJB5   | GJB6   | GJB7     | GJC1     |
| GJC2     | GJC3    | GJD2    | GJD3   | GJD3   | GJD4   | GKN1     | GKN2     |
| GKN2     | GLB1L   | GLB1L2  | GLDN   | GLG1   | GLIPR1 | GLIPR1L1 | GLIPR1L2 |
| GLIPR1L2 | GLP1R   | GLP2R   | GLRA1  | GLRA1  | GLRA2  | GLRA2    | GLRA3    |
| GLRA4    | GLRB    | GLT1D1  | GML    | GNA11  | GNA13  | GNA15    | GNAS     |
| GNAS     | GNAS    | GNB1    | GNB3   | GNB3   | GNB4   | GNG11    | GNG12    |
| GNG2     | GNG5    | GNGT1   | GNLY   | GNPTG  | GNRH1  | GNRH2    | GNRHR    |
| GP1BA    | GP1BA   | GP1BA   | GP1BB  | GP2    | GP2    | GP5      | GP6      |
| GP9      | GPA33   | GPBAR1  | GPC1   | GPC1   | GPC2   | GPC2     | GPC2     |
| GPC3     | GPC3    | GPC3    | GPC4   | GPC4   | GPC5   | GPC5     | GPC6     |
| GPC6     | GPER1   | GPER1   | GPHA2  | GPHB5  | GPI    | GPIHBP1  | GPLD1    |
| GPLD1    | GPM6A   | GPM6B   | GPM6B  | GPNMB  | GPNMB  | GPR1     | GPR101   |
| GPR107   | GPR108  | GPR119  | GPR12  | GPR132 | GPR132 | GPR135   | GPR135   |
| GPR137   | GPR137B | GPR137C | GPR139 | GPR141 | GPR142 | GPR143   | GPR143   |
| GPR146   | GPR148  | GPR149  | GPR15  | GPR150 | GPR151 | GPR151   | GPR152   |
| GPR153   | GPR156  | GPR157  | GPR157 | GPR158 | GPR15L | GPR160   | GPR161   |
| GPR161   | GPR162  | GPR162  | GPR17  | GPR17  | GPR171 | GPR173   | GPR173   |
| GPR174   | GPR176  | GPR179  | GPR18  | GPR182 | GPR182 | GPR183   | GPR183   |
| GPR20    | GPR21   | GPR22   | GPR25  | GPR26  | GPR27  | GPR3     | GPR3     |
| GPR31    | GPR32   | GPR33   | GPR34  | GPR34  | GPR35  | GPR37    | GPR37L1  |
| GPR39    | GPR4    | GPR42   | GPR45  | GPR50  | GPR52  | GPR55    | GPR55    |
| GPR6     | GPR61   | GPR62   | GPR63  | GPR65  | GPR65  | GPR68    | GPR75    |
| GPR78    | GPR82   | GPR83   | GPR84  | GPR84  | GPR85  | GPR85    | GPR87    |
| GPR88    | GPR89B  | GPRC5A  | GPRC5B | GPRC5B | GPRC5C | GPRC5C   | GPRC5C   |
| GPRC5C   | GPRC5D  | GPRC6A  | GPX3   | GPX5   | GPX6   | GPX7     | GRAMD1A  |
| GRAMD1B  | GRAMD1C | GRAMD2A | GREM1  | GREM2  | GRIA1  | GRIA2    | GRIA3    |
| GRIA3    | GRIA4   | GRIA4   | GRID1  | GRID1  | GRID2  | GRIK1    | GRIK1    |
| GRIK2    | GRIK2   | GRIK3   | GRIK4  | GRIK5  | GRIN1  | GRIN1    | GRIN2A   |
| GRIN2B   | GRIN2C  | GRIN2D  | GRIN3A | GRIN3B | GRK7   | GRM1     | GRM2     |
| GRM3     | GRM3    | GRM4    | GRM5   | GRM6   | GRM7   | GRM8     | GRN      |
| GRP      | GRPR    | GSG1L   | GSG1L  | GSG1L  | GSG1L2 | GSN      | GUCA2A   |
| GUCA2B   | GUCY2C  | GUCY2C  | GUCY2D | GUCY2F | GYPB   | GYPB     | GYPB     |
| GYPB     | GYPE    | GZMA    | GZMA   | GZMK   | GZMM   | HABP2    | HAMP     |
| HAPLN1   | HAPLN2  | HAPLN3  | HAPLN3 | HAPLN4 | HAS1   | HAS2     | HAS3     |
| HAS3     | HAS3    | HAVCR1  | HAVCR1 | HAVCR2 | HBEGF  | HBEGF    | HCAR1    |
| HCAR1    | HCAR2   | HCAR3   | HCG22  | HCK    | HCN1   | HCN2     | HCN3     |

| HCN4     | HCRT1    | HCRT2    | HCST     | HDGF     | HEG1      | HEPACAM  | HEPH     |
|----------|----------|----------|----------|----------|-----------|----------|----------|
| HEPHL1   | HFE      | HFE      | HFE      | HGFAC    | HHIP      | HHIP     | HHIPL1   |
| HHIPL2   | HHLA1    | HHLA2    | HIDE1    | HIGD1B   | HIGD1C    | HIGD2B   | HILPDA   |
| HILPDA   | HJV      | HJV      | HJV      | HLA-A    | HLA-A     | HLA-A    | HLA-B    |
| HLA-C    | HLA-DOA  | HLA-DOB  | HLA-DPA1 | HLA-DPA1 | HLA-DPB1  | HLA-DPB1 | HLA-DQA1 |
| HLA-DQA2 | HLA-DQB1 | HLA-DQB2 | HLA-DQB2 | HLA-DRA  | HLA-DRB1  | HLA-DRB1 | HLA-DRB3 |
| HLA-DRB4 | HLA-DRB5 | HLA-E    | HLA-F    | HLA-G    | HLA-G     | HLA-H    | HM13     |
| HMGB1    | HMGB2    | HMMR     | HMMR     | HMSD     | HNRNPA2B1 | HOMER1   | HOMER2   |
| HOMER3   | HP       | HPN      | HPR      | HPSE     | HPSE2     | HPX      | HRG      |
| HRH1     | HRH2     | HRH2     | HRH3     | HRH4     | HS6ST1    | HSD11B1L | HSD17B11 |
| HSD17B13 | HSD17B7  | HSP90AB1 | HSPB6    | HTN1     | HTN3      | HTR1A    | HTR1B    |
| HTR1D    | HTR1D    | HTR1E    | HTR1F    | HTR2A    | HTR2A     | HTR2A    | HTR2B    |
| HTR2C    | HTR3A    | HTR3A    | HTR3B    | HTR3C    | HTR3C     | HTR3D    | HTR3D    |
| HTR3E    | HTR3E    | HTR4     | HTR5A    | HTR6     | HTR7      | HTR7     | HTRA1    |
| HTRA3    | HTRA4    | HVCN1    | HYAL1    | HYAL2    | HYAL3     | HYAL4    | IAPP     |
| IBSP     | ICAM1    | ICAM2    | ICAM2    | ICAM3    | ICAM4     | ICAM4    | ICAM4    |
| ICAM4    | ICAM5    | ICOS     | ICOS     | ICOSLG   | IDE       | IDE      | IER3     |
| IF130    | IF130    | IFITM1   | IFITM10  | IFITM2   | IFITM3    | IFITM5   | IFNA1    |
| IFNA10   | IFNA14   | IFNA16   | IFNA16   | IFNA17   | IFNA2     | IFNA21   | IFNA4    |
| IFNA5    | IFNA6    | IFNA7    | IFNA8    | IFNAR1   | IFNAR2    | IFNAR2   | IFNAR2   |
| IFNB1    | IFNE     | IFNG     | IFNG     | IFNGR1   | IFNGR2    | IFNGR2   | IFNK     |
| IFNL1    | IFNL2    | IFNL3    | IFNL4    | IFNLR1   | IFNLR1    | IFNW1    | IGDCC3   |
| IGDCC4   | IGF1     | IGF1R    | IGF2     | IGFALS   | IGFBP1    | IGFBP2   | IGFBP3   |
| IGFBP4   | IGFBP5   | IGFBP6   | IGFBP7   | IGFBPL1  | IGFL1     | IGFL2    | IGFL3    |
| IGFL4    | IGFLR1   | IGHA1    | IGHA1    | IGHA2    | IGHD      | IGHE     | IGHG1    |
| IGHG2    | IGHG3    | IGHG3    | IGHG4    | IGHM     | IGHM      | IGIP     | IGKC     |
| IGLC1    | IGLC2    | IGLC3    | IGLC6    | IGLC7    | IPLL1     | IPLL1    | IPLL5    |
| IPLL5    | IPLON5   | IGSF1    | IGSF1    | IGSF1    | IGSF11    | IGSF11   | IGSF21   |
| IGSF23   | IGSF3    | IGSF5    | IGSF6    | IGSF8    | IGSF9     | IGSF9    | IGSF9B   |
| IGSF9B   | IHH      | IHH      | IL10     | IL10RA   | IL10RB    | IL11     | IL11RA   |
| IL11RA   | IL11RA   | IL12A    | IL12B    | IL12B    | IL12B     | IL12RB1  | IL12RB1  |
| IL12RB2  | IL13     | IL13RA1  | IL13RA2  | IL15     | IL15      | IL15RA   | IL15RA   |
| IL15RA   | IL16     | IL16     | IL17A    | IL17B    | IL17C     | IL17D    | IL17F    |
| IL17RA   | IL17RA   | IL17RB   | IL17RC   | IL17RC   | IL17RD    | IL17RE   | IL17RE   |
| IL18     | IL18     | IL18BP   | IL18R1   | IL18RAP  | IL19      | IL1A     | IL1A     |
| IL1B     | IL1B     | IL1F10   | IL1R1    | IL1R1    | IL1R1     | IL1R2    | IL1R2    |
| IL1R2    | IL1RAP   | IL1RAP   | IL1RAP   | IL1RAPL1 | IL1RAPL2  | IL1RL1   | IL1RL1   |
| IL1RL1   | IL1RL2   | IL1RL2   | IL1RN    | IL1RN    | IL1RN     | IL2      | IL20     |
| IL20RA   | IL20RB   | IL21     | IL21R    | IL22     | IL22RA1   | IL22RA2  | IL23A    |
| IL23A    | IL23R    | IL24     | IL25     | IL26     | IL26      | IL27     | IL27RA   |
| IL2RA    | IL2RB    | IL2RG    | IL3      | IL31     | IL31RA    | IL31RA   | IL31RA   |
| IL32     | IL33     | IL34     | IL36A    | IL36B    | IL36G     | IL36RN   | IL37     |
| IL3RA    | IL3RA    | IL4      | IL4R     | IL4R     | IL5       | IL5RA    | IL5RA    |
| IL6      | IL6R     | IL6R     | IL6R     | IL6ST    | IL6ST     | IL6ST    | IL7      |
| IL7R     | IL9      | IL9R     | IL9R     | ILDR1    | ILDR1     | IMPG1    | INHA     |

|          |           |           |          |           |         |         |          |
|----------|-----------|-----------|----------|-----------|---------|---------|----------|
| INHBA    | INHBB     | INHBC     | INHBE    | INPP5D    | INS     | INSL3   | INSL4    |
| INSL5    | INSL6     | INSR      | INSR     | INSRR     | ISG15   | ISLR    | ISLR     |
| ISLR2    | ISM1      | ISM2      | ITFG1    | ITFG1     | ITGA10  | ITGA11  | ITGA2    |
| ITGA2B   | ITGA3     | ITGA4     | ITGA5    | ITGA6     | ITGA7   | ITGA7   | ITGA8    |
| ITGA9    | ITGA9     | ITGAD     | ITGAE    | ITGAL     | ITGAM   | ITGAM   | ITGAM    |
| ITGAV    | ITGAV     | ITGAX     | ITGB1    | ITGB1     | ITGB1   | ITGB1   | ITGB2    |
| ITGB3    | ITGB4     | ITGB5     | ITGB6    | ITGB7     | ITGB8   | ITGB8   | ITGBL1   |
| ITGBL1   | ITIH1     | ITIH2     | ITIH3    | ITIH4     | ITIH6   | ITLN1   | ITLN1    |
| ITLN1    | ITLN2     | ITM2A     | ITM2B    | ITM2B     | ITM2C   | ITPRIP  | ITPRIPL1 |
| ITPRIPL2 | IYD       | IZUMO1    | IZUMO1R  | IZUMO2    | IZUMO2  | IZUMO3  | IZUMO4   |
| JAG1     | JAG2      | JAM2      | JAM3     | JAM3      | JAML    | JAML    | JCHAIN   |
| JTB      | KARS1     | KAZALD1   | KCNA1    | KCNA10    | KCNA2   | KCNA2   | KCNA3    |
| KCNA4    | KCNA5     | KCNA5     | KCNA6    | KCNA7     | KCNAB2  | KCNB1   | KCNB2    |
| KCNC1    | KCNC2     | KCNC3     | KCNC4    | KCND1     | KCND2   | KCND3   | KCNE1    |
| KCNE2    | KCNE3     | KCNE4     | KCNE4    | KCNE5     | KCNG1   | KCNG1   | KCNG3    |
| KCNG4    | KCNG4     | KCNH1     | KCNH2    | KCNH2     | KCNH3   | KCNH4   | KCNH5    |
| KCNH6    | KCNH6     | KCNH7     | KCNH7    | KCNH8     | KCNIP1  | KCNIP1  | KCNIP2   |
| KCNIP2   | KCNIP3    | KCNJ1     | KCNJ1    | KCNJ10    | KCNJ11  | KCNJ11  | KCNJ12   |
| KCNJ13   | KCNJ14    | KCNJ15    | KCNJ16   | KCNJ18    | KCNJ2   | KCNJ3   | KCNJ4    |
| KCNJ5    | KCNJ6     | KCNJ8     | KCNJ9    | KCNK1     | KCNK10  | KCNK12  | KCNK13   |
| KCNK16   | KCNK17    | KCNK18    | KCNK2    | KCNK2     | KCNK3   | KCNK4   | KCNK5    |
| KCNK6    | KCNK7     | KCNK7     | KCNK7    | KCNK9     | KCNMA1  | KCNMA1  | KCNMB1   |
| KCNMB1   | KCNMB2    | KCNMB3    | KCNMB4   | KCNN1     | KCNN2   | KCNN2   | KCNN3    |
| KCNN3    | KCNN3     | KCNN4     | KCNQ1    | KCNQ1     | KCNQ2   | KCNQ2   | KCNQ3    |
| KCNQ4    | KCNQ5     | KCNQ5     | KCNS1    | KCNS2     | KCNS3   | KCNT1   | KCNT2    |
| KCNV1    | KCNV2     | KCT2      | KCTD12   | KDR       | KEL     | KERA    | KIAA0319 |
| KIAA0319 | KIAA0319L | KIAA0319L | KIAA2013 | KIDINS220 | KIR2DL1 | KIR2DL1 | KIR2DL2  |
| KIR2DL3  | KIR2DL4   | KIR2DL5A  | KIR2DL5B | KIR2DS1   | KIR2DS2 | KIR2DS2 | KIR2DS3  |
| KIR2DS4  | KIR2DS5   | KIR3DL1   | KIR3DL2  | KIR3DL3   | KIR3DS1 | KIR3DS1 | KIR3DX1  |
| KIRREL1  | KIRREL2   | KIRREL2   | KIRREL3  | KIRREL3   | KISS1   | KISS1R  | KIT      |
| KIT      | KITLG     | KITLG     | KITLG    | KL        | KL      | KLB     | KLK10    |
| KLK11    | KLK12     | KLK13     | KLK14    | KLK15     | KLK2    | KLK3    | KLK4     |
| KLK5     | KLK6      | KLK7      | KLK7     | KLK8      | KLK9    | KLKB1   | KLKB1    |
| KLRB1    | KLRC1     | KLRC1     | KLRC2    | KLRC2     | KLRC3   | KLRC4   | KLRD1    |
| KLRF1    | KLRF1     | KLRF2     | KLRG1    | KLRG2     | KLRK1   | KNG1    | KNG1     |
| KRAS     | KREMEN1   | KREMEN2   | KREMEN2  | KRT10     | KRT19   | KRTDAP  | L1CAM    |
| LACRT    | LAD1      | LAG3      | LAG3     | LAIR1     | LAIR2   | LAIR2   | LALBA    |
| LALBA    | LAMA4     | LAMA4     | LAMB2    | LAMB3     | LAMC1   | LAMC3   | LAMP1    |
| LAMP2    | LAMP2     | LAMP5     | LAPTM4B  | LAS2      | LAS2    | LAT     | LAT      |
| LAT      | LAT2      | LAX1      | LAX1     | LAYN      | LAYN    | LBP     | LBP      |
| LCAT     | LCAT      | LCK       | LCK      | LCN1      | LCN10   | LCN12   | LCN15    |
| LCN2     | LCN6      | LCN8      | LCN9     | LCN9      | LCP1    | LCT     | LCTL     |
| LDLR     | LDLR      | LDLRAD2   | LDLRAD3  | LEAP2     | LECT2   | LEFTY1  | LEFTY2   |
| LEG1     | LEG1      | LEP       | LEPR     | LEPR      | LEPR    | LGALS1  | LGALS1   |
| LGALS1   | LGALS3    | LGALS3    | LGALS3BP | LGALS7    | LGALS9  | LGALS9  | LGALS9   |

|          |          |          |          |          |          |          |          |
|----------|----------|----------|----------|----------|----------|----------|----------|
| LGI1     | LGI2     | LGI3     | LGI4     | LGR4     | LGR4     | LGR5     | LGR6     |
| LGR6     | LHB      | LHCGR    | LHFPL2   | LHFPL3   | LHFPL3   | LHFPL4   | LHFPL5   |
| LIF      | LIFR     | LILRA1   | LILRA2   | LILRA2   | LILRA3   | LILRA3   | LILRA4   |
| LILRA5   | LILRA5   | LILRA6   | LILRB1   | LILRB1   | LILRB2   | LILRB3   | LILRB4   |
| LILRB5   | LIM2     | LIM2     | LIME1    | LIMS2    | LINGO1   | LINGO1   | LINGO2   |
| LINGO3   | LINGO4   | LIPC     | LIPC     | LIPF     | LIPG     | LIPH     | LIPH     |
| LIP1     | LIP1     | LIPK     | LIPM     | LIPN     | LLCFC1   | LMBR1    | LMBR1L   |
| LMBR1L   | LMBRD1   | LMBRD1   | LMBRD2   | LNPEP    | LNPEP    | LNPEP    | LOX      |
| LOXL1    | LOXL2    | LOXL3    | LOXL4    | LPAR1    | LPAR1    | LPAR2    | LPAR3    |
| LPAR4    | LPAR5    | LPAR5    | LPAR6    | LPAR6    | LPCAT1   | LPCAT2   | LPL      |
| LPL      | LPO      | LRCH3    | LRCH3    | LRCH3    | LRFN1    | LRFN2    | LRFN3    |
| LRFN4    | LRFN5    | LRG1     | LRIG1    | LRIG1    | LRIG2    | LRIG3    | LRT2     |
| LRP1     | LRP10    | LRP11    | LRP12    | LRP3     | LRP4     | LRP5     | LRP6     |
| LRP8     | LRP8     | LRP8     | LRP8     | LRP8     | LRP8     | LRRC15   | LRRC17   |
| LRRC19   | LRRC25   | LRRC26   | LRRC32   | LRRC37B  | LRRC38   | LRRC3C   | LRRC4    |
| LRRC4    | LRRC4B   | LRRC4C   | LRRC52   | LRRC55   | LRRC8A   | LRRC8B   | LRRC8B   |
| LRRC8C   | LRRC8D   | LRRC8E   | LRRN1    | LRRN2    | LRRN3    | LRRN4    | LRRN4CL  |
| LRRTM1   | LRRTM2   | LRRTM3   | LRRTM3   | LRRTM4   | LRRTM4   | LRTM1    | LRTM2    |
| LSAMP    | LSP1     | LSR      | LST1     | LST1     | LTA      | LTA      | LTA      |
| LTB      | LTB4R    | LTB4R    | LTB4R2   | LTB4R2   | LTBP2    | LTBR     | LTF      |
| LTF      | LTK      | LUM      | LUZP2    | LY6D     | LY6E     | LY6G5B   | LY6G5B   |
| LY6G5C   | LY6G5C   | LY6G6C   | LY6G6D   | LY6G6F   | LY6H     | LY6K     | LY6K     |
| LY6L     | LY86     | LY86     | LY9      | LY96     | LY96     | LYG1     | LYG2     |
| LYNX1    | LYPD1    | LYPD2    | LYPD3    | LYPD4    | LYPD4    | LYPD5    | LYPD5    |
| LYPD6    | LYPD6    | LYPD6B   | LYPD6B   | LYPD8    | LYPD8    | LYSMD3   | LYSMD3   |
| LYSMD4   | LYVE1    | LYZ      | LYZL1    | LYZL2    | LYZL4    | LYZL6    | M6PR     |
| MADCAM1  | MADCAM1  | MAG      | MAGEE1   | MAGT1    | MAL      | MAL      | MAL2     |
| MALL     | MAMDC2   | MAMDC4   | MAN2B2   | MANF     | MANSC1   | MARCHF1  | MARCHF6  |
| MARCKSL1 | MARCKSL1 | MARCO    | MARVELD1 | MARVELD1 | MARVELD2 | MARVELD3 | MARVELD3 |
| MAS1     | MASIL    | MASP1    | MASP2    | MATN1    | MATN2    | MATN3    | MATN4    |
| MBL2     | MC1R     | MC1R     | MC2R     | MC3R     | MC3R     | MC4R     | MC5R     |
| MCAM     | MCEMP1   | MCHR1    | MCHR1    | MCHR2    | MCOLN1   | MCOLN1   | MCOLN2   |
| MCOLN3   | MCOLN3   | MDGA1    | MDGA2    | MDK      | MDK      | MEGF10   | MEGF10   |
| MEGF11   | MEGF6    | MEGF9    | MEGF9    | MELTF    | MELTF    | MENT     | MENT     |
| MEP1A    | MEP1B    | MEP1B    | MEPE     | MERTK    | MERTK    | MET      | METRNL   |
| METRNL   | METRNL   | METTTL24 | MFAP2    | MFAP3    | MFAP3L   | MFAP3L   | MFAP3L   |
| MFAP4    | MFAP5    | MFGE8    | MFGE8    | MFGE8    | MFGE8    | MFRP     | MFSD10   |
| MFSD14A  | MFSD14B  | MFSD14B  | MFSD2A   | MFSD2A   | MFSD2B   | MFSD4B   | MFSD5    |
| MFSD8    | MFSD9    | MGAT4A   | MGAT5    | MGP      | MIA      | MICA     | MICB     |
| MICB     | MIF      | MILR1    | MILR1    | MIP      | MLANA    | MLC1     | MLN      |
| MLNR     | MME      | MMEL1    | MMP1     | MMP10    | MMP11    | MMP12    | MMP13    |
| MMP14    | MMP14    | MMP15    | MMP15    | MMP16    | MMP17    | MMP19    | MMP2     |
| MMP2     | MMP20    | MMP21    | MMP23B   | MMP24    | MMP25    | MMP25    | MMP26    |
| MMP28    | MMP3     | MMP7     | MMP8     | MMP9     | MMP9     | MMRN1    | MMRN1    |
| MMRN2    | MOG      | MOG      | MOSMO    | MPEG1    | MPIG6B   | MPIG6B   | MPL      |

|          |          |          |          |           |           |           |          |
|----------|----------|----------|----------|-----------|-----------|-----------|----------|
| MPZ      | MPZ      | MPZL1    | MPZL2    | MPZL3     | MR1       | MR1       | MRAP     |
| MRAP     | MRAP2    | MRAS     | MRC1     | MRC2      | MRGPRD    | MRGPRD    | MRGPRE   |
| MRGPRE   | MRGPRF   | MRGPRG   | MRGPRX1  | MRGPRX2   | MRGPRX2   | MRGPRX3   | MRGPRX3  |
| MRGPRX3  | MRGPRX4  | MS4A1    | MS4A10   | MS4A12    | MS4A2     | MS4A3     | MS4A4A   |
| MS4A5    | MS4A6A   | MS4A6E   | MS4A7    | MS4A8     | MSLN      | MSLN      | MSLN     |
| MSMB     | MSMP     | MSN      | MSR1     | MST1      | MST1L     | MST1R     | MSTN     |
| MTNR1A   | MTNR1A   | MTNR1B   | MTRNR2L1 | MTRNR2L10 | MTRNR2L2  | MTRNR2L3  | MTRNR2L4 |
| MTRNR2L5 | MTRNR2L6 | MTRNR2L7 | MTRNR2L8 | MTRNR2L9  | MTUS1     | MUC1      | MUC1     |
| MUC1     | MUC1     | MUC1     | MUC1     | MUC1      | MUC1      | MUC1      | MUC1     |
| MUC13    | MUC13    | MUC15    | MUC15    | MUC20     | MUC20     | MUC20     | MUC21    |
| MUC22    | MUC4     | MUC4     | MUC7     | MUCL1     | MUCL3     | MUSK      | MXRA8    |
| MYADM    | MYADM    | MYDGF    | MYMK     | MYMX      | MYOC      | MYOF      | MZB1     |
| NAALAD2  | NAALADL1 | NAALADL2 | NAALADL2 | NAE1      | NALCN     | NAMPT     | NAPSA    |
| NAXD     | NAXE     | NBEA     | NBL1     | NCAM1     | NCAM1     | NCAN      | NCEH1    |
| NCKAP1   | NCMAP    | NCMAP    | NCR1     | NCR1      | NCR2      | NCR3      | NCR3LG1  |
| NCSTN    | NCSTN    | NDFIP1   | NDFIP1   | NDFIP2    | NDFIP2    | NDNF      | NDP      |
| NECTIN1  | NECTIN1  | NECTIN1  | NECTIN1  | NECTIN2   | NECTIN2   | NECTIN3   | NECTIN3  |
| NECTIN4  | NECTIN4  | NEGR1    | NELL1    | NELL2     | NELL2     | NENF      | NEO1     |
| NETO1    | NETO1    | NETO2    | NEU1     | NEU1      | NFAM1     | NFASC     | NFASC    |
| NFASC    | NGEF     | NGF      | NGFR     | NGRN      | NHLRC3    | NIBAN2    | NID1     |
| NINJ1    | NINJ2    | NINJ2    | NIPA1    | NIPA1     | NIPA1     | NIPA2     | NIPAL1   |
| NIPAL4   | NKAIN1   | NKAIN1   | NKAIN2   | NKAIN2    | NKAIN3    | NKAIN4    | NKD2     |
| NKG7     | NLGN1    | NLGN2    | NLGN3    | NLGN4X    | NLGN4Y    | NLGN4Y    | NLRP3    |
| NMB      | NMBR     | NMS      | NMS      | NMU       | NMUR1     | NMUR2     | NODAL    |
| NOG      | NOMO1    | NOMO3    | NOTCH1   | NOTCH2    | NOTCH2NLA | NOTCH2NLC | NOTCH3   |
| NOTCH4   | NOTUM    | NOX1     | NOX3     | NOX4      | NOX5      | NPB       | NPBWR1   |
| NPBWR1   | NPBWR2   | NPC1L1   | NPC2     | NPFF      | NPFF      | NPFFR1    | NPFFR2   |
| NPHS1    | NPIP15   | NPNT     | NPPA     | NPPB      | NPPC      | NPR1      | NPR2     |
| NPR3     | NPS      | NPS      | NPSR1    | NPSR1     | NPTN      | NPTN      | NPTX2    |
| NPTXR    | NPTXR    | NPVF     | NPW      | NPY       | NPY1R     | NPY2R     | NPY4R    |
| NPY4R2   | NPY5R    | NPY6R    | NRAC     | NRAC      | NRCAM     | NRCAM     | NRG1     |
| NRG1     | NRG1     | NRG1     | NRG1     | NRG1      | NRG1      | NRG2      | NRG2     |
| NRG2     | NRG2     | NRG3     | NRG3     | NRG4      | NRN1      | NRN1L     | NRN1L    |
| NRP1     | NRP1     | NRP1     | NRP1     | NRP2      | NRP2      | NRP2      | NRP2     |
| NRROS    | NRSN2    | NRTN     | NRXN1    | NRXN2     | NRXN3     | NRXN3     | NRXN3    |
| NSG1     | NSUN2    | NT5E     | NT5E     | NT5E      | NTF3      | NTF4      | NTM      |
| NTM      | NTN1     | NTN3     | NTN4     | NTN5      | NTNG1     | NTNG1     | NTNG1    |
| NTNG2    | NTRK1    | NTRK1    | NTRK1    | NTRK2     | NTRK2     | NTRK3     | NTRK3    |
| NTRK3    | NTS      | NTSR1    | NTSR2    | NTSR2     | NUCB1     | NXPE1     | NXPE3    |
| NXPE4    | NXPH1    | NXPH2    | NXPH3    | NXPH4     | NYX       | NYX       | OAS1     |
| OBP2A    | OBP2B    | OC90     | OCA2     | OCA2      | OCLN      | OCSTAMP   | ODAM     |
| ODAPH    | OGN      | OIT3     | OLFM1    | OLFM2     | OLFM3     | OLFM4     | OLFM4    |
| OLFML1   | OLFML2A  | OLFML2B  | OLFML3   | OLR1      | OLR1      | OMD       | OMG      |
| OOSP2    | OPALIN   | OPCML    | OPN1LW   | OPN1MW    | OPN1SW    | OPN1SW    | OPN3     |
| OPN4     | OPN5     | OPRD1    | OPRK1    | OPRL1     | OPRM1     | OPRPN     | OPTC     |

|         |         |         |         |         |          |          |          |
|---------|---------|---------|---------|---------|----------|----------|----------|
| OR10R2  | OR10T2  | OR13A1  | OR1D2   | OR2L13  | OR2W3    | OR4N2    | OR4N2    |
| OR51E1  | OR51E2  | OR5V1   | OR7A5   | OR7C1   | OR7D2    | OR8G1    | OR8S1    |
| OR9Q1   | ORAI1   | ORAI2   | ORAI3   | ORM1    | ORM2     | OSCAR    | OSCAR    |
| OSCAR   | OSCAR   | OSCAR   | OSCP1   | OSM     | OSMR     | OSMR     | OSTC     |
| OSTN    | OTOA    | OTOA    | OTOL1   | OTOP1   | OTOP1    | OTOP2    | OTOP3    |
| OTOR    | OTOS    | OVCH1   | OXER1   | OXGR1   | OXT      | OXTR     | P2RX1    |
| P2RX2   | P2RX2   | P2RX3   | P2RX4   | P2RX4   | P2RX5    | P2RX5    | P2RX5    |
| P2RX6   | P2RX6   | P2RX7   | P2RX7   | P2RY1   | P2RY10   | P2RY11   | P2RY12   |
| P2RY12  | P2RY12  | P2RY12  | P2RY13  | P2RY13  | P2RY14   | P2RY14   | P2RY2    |
| P2RY2   | P2RY2   | P2RY4   | P2RY4   | P2RY6   | P2RY6    | P2RY6    | P2RY8    |
| P2RY8   | P2RY8   | P3H1    | P4HB    | PACC1   | PAEP     | PAG1     | PAG1     |
| PAM     | PAMR1   | PANX1   | PANX1   | PANX2   | PANX2    | PANX3    | PAPLN    |
| PAPLN   | PAPPA   | PAQR4   | PAQR5   | PAQR5   | PAQR6    | PAQR6    | PAQR6    |
| PAQR7   | PAQR8   | PAQR8   | PAQR9   | PARD6A  | PARM1    | PARM1    | PATE1    |
| PATE2   | PATE3   | PCDH1   | PCDH1   | PCDH10  | PCDH10   | PCDH11X  | PCDH11Y  |
| PCDH12  | PCDH15  | PCDH17  | PCDH18  | PCDH19  | PCDH20   | PCDH20   | PCDH7    |
| PCDH8   | PCDH8   | PCDH9   | PCDHA1  | PCDHA1  | PCDHA10  | PCDHA10  | PCDHA10  |
| PCDHA11 | PCDHA12 | PCDHA13 | PCDHA2  | PCDHA2  | PCDHA3   | PCDHA4   | PCDHA5   |
| PCDHA6  | PCDHA6  | PCDHA6  | PCDHA6  | PCDHA7  | PCDHA7   | PCDHA8   | PCDHA9   |
| PCDHAC1 | PCDHAC2 | PCDHAC2 | PCDHB1  | PCDHB10 | PCDHB11  | PCDHB12  | PCDHB13  |
| PCDHB14 | PCDHB15 | PCDHB16 | PCDHB16 | PCDHB2  | PCDHB3   | PCDHB4   | PCDHB5   |
| PCDHB6  | PCDHB7  | PCDHB8  | PCDHB9  | PCDHGA1 | PCDHGA10 | PCDHGA11 | PCDHGA12 |
| PCDHGA2 | PCDHGA2 | PCDHGA3 | PCDHGA4 | PCDHGA5 | PCDHGA5  | PCDHGA6  | PCDHGA7  |
| PCDHGA8 | PCDHGA8 | PCDHGA9 | PCDHGA9 | PCDHGB1 | PCDHGB2  | PCDHGB3  | PCDHGB4  |
| PCDHGB5 | PCDHGB6 | PCDHGB6 | PCDHGB7 | PCDHGC3 | PCDHGC3  | PCDHGC4  | PCDHGC4  |
| PCDHGC5 | PCOLCE  | PCOLCE2 | PCSK1N  | PCSK2   | PCSK5    | PCSK6    | PCSK7    |
| PCSK9   | PCSK9   | PCYOX1  | PCYOX1L | PDCD1   | PDCD1LG2 | PDCD6IP  | PDGFA    |
| PDGFB   | PDGFB   | PDGFC   | PDGFD   | PDGFRA  | PDGFRA   | PDGFRA   | PDGFRB   |
| PDGFRL  | PDGFRL  | PDIA6   | PDLIM5  | PDLIM5  | PDLIM5   | PDLIM5   | PDLIM5   |
| PDPN    | PDPN    | PDPN    | PDPN    | PDYN    | PDYN     | PDZD11   | PEAR1    |
| PECAM1  | PENK    | PERP    | PF4     | PF4V1   | PGA3     | PGA4     | PGA5     |
| PGAP6   | PGC     | PGF     | PGLYRP1 | PGLYRP2 | PGLYRP2  | PGLYRP3  | PGLYRP4  |
| PGRMC1  | PHEX    | PI15    | PI16    | PI16    | PI16     | PI3      | PI3      |
| PIANP   | PIBF1   | PIEZO1  | PIEZO1  | PIGBOS1 | PIGF     | PIGO     | PIGP     |
| PIGQ    | PIGR    | PIGR    | PIGU    | PIGZ    | PIK3IP1  | PILRA    | PILRA    |
| PILRA   | PILRA   | PILRB   | PILRB   | PILRB   | PINLYP   | PIP      | PIP4P1   |
| PIP4P2  | PKD1L1  | PKD1L2  | PKD1L2  | PKD1L2  | PKD1L3   | PKD2     | PKD2L1   |
| PKD2L2  | PKD2L2  | PKDCC   | PLA1A   | PLA2G10 | PLA2G12A | PLA2G12B | PLA2G15  |
| PLA2G1B | PLA2G2A | PLA2G2A | PLA2G2C | PLA2G2D | PLA2G2E  | PLA2G2E  | PLA2G2F  |
| PLA2G3  | PLA2G3  | PLA2G3  | PLA2G5  | PLA2G5  | PLA2G6   | PLA2G7   | PLA2R1   |
| PLA2R1  | PLA2R1  | PLAAT3  | PLAC1   | PLAC9   | PLAT     | PLAT     | PLAU     |
| PLAUR   | PLAUR   | PLAUR   | PLAUR   | PLB1    | PLB1     | PLB1     | PLET1    |
| PLG     | PLGLB2  | PLGRKT  | PLLP    | PLOD3   | PLP1     | PLP2     | PLP2     |
| PLPP1   | PLPP2   | PLPP3   | PLPP5   | PLPP7   | PLPPR5   | PLSCR1   | PLSCR2   |
| PLSCR2  | PLSCR3  | PLSCR4  | PLSCR4  | PLTP    | PLVAP    | PLVAP    | PLXDC1   |

|         |         |         |          |          |          |        |         |
|---------|---------|---------|----------|----------|----------|--------|---------|
| PLXDC2  | PLXDC2  | PLXNA1  | PLXNA2   | PLXNA3   | PLXNA4   | PLXNA4 | PLXNB1  |
| PLXNB2  | PLXNB3  | PLXNC1  | PLXND1   | PM20D1   | PMCH     | PMEL   | PMEL    |
| PMP22   | PNLDC1  | PNLIP   | PNLIPRP1 | PNLIPRP2 | PNLIPRP3 | PNOC   | PNPLA2  |
| PODN    | PODNL1  | PODXL   | PODXL    | PODXL2   | POMC     | PONI   | PON3    |
| POPDC2  | POPDC3  | PORCN   | PORCN    | POSTN    | POTED    | PPBP   | PPIA    |
| PPMIL   | PPMIL   | PPMIL   | PPP1R3F  | PPT1     | PPT1     | PPY    | PRADC1  |
| PRAP1   | PRB2    | PRB3    | PRCD     | PRELP    | PRELP    | PRF1   | PRF1    |
| PRG2    | PRH1    | PRIMA1  | PRKCA    | PRKCH    | PRL      | PRLH   | PRLHR   |
| PRLR    | PRLR    | PRMT8   | PRMT8    | PRND     | PRNP     | PROC   | PROC    |
| PROCR   | PROK1   | PROK2   | PROKR1   | PROKR2   | PROM1    | PROM1  | PROM2   |
| PROS1   | PROZ    | PRR27   | PRR4     | PRR7     | PRR7     | PRRG1  | PRRG2   |
| PRRG3   | PRRG4   | PRRT1   | PRRT1    | PRRT2    | PRRT3    | PRSS1  | PRSS12  |
| PRSS2   | PRSS21  | PRSS22  | PRSS22   | PRSS23   | PRSS27   | PRSS3  | PRSS33  |
| PRSS35  | PRSS36  | PRSS37  | PRSS38   | PRSS41   | PRSS42P  | PRSS48 | PRSS53  |
| PRSS54  | PRSS55  | PRSS57  | PRSS58   | PRSS8    | PRTG     | PRTN3  | PRXL2A  |
| PSAP    | PSAP    | PSAPL1  | PSCA     | PSD2     | PSEN1    | PSEN2  | PSENEEN |
| PSG1    | PSG1    | PSG11   | PSG2     | PSG3     | PSG4     | PSG5   | PSG5    |
| PSG6    | PSG7    | PSG8    | PSG9     | PSORS1C2 | PSPN     | PSPN   | PTAFR   |
| PTAFR   | PTCH1   | PTCH1   | PTCH2    | PTCHD1   | PTCRA    | PTCRA  | PTEN    |
| PTGDR   | PTGDR2  | PTGDS   | PTGER1   | PTGER2   | PTGER3   | PTGER3 | PTGER3  |
| PTGER3  | PTGER4  | PTGFR   | PTGFRN   | PTGIR    | PTH      | PTH1R  | PTH2    |
| PTH2R   | PTHLH   | PTK7    | PTK7     | PTN      | PTPRA    | PTPRA  | PTPRB   |
| PTPRC   | PTPRCAP | PTPRD   | PTPRE    | PTPRF    | PTPRG    | PTPRH  | PTPRJ   |
| PTPRJ   | PTPRK   | PTPRK   | PTPRM    | PTPRN    | PTPRN    | PTPRN2 | PTPRN2  |
| PTPRO   | PTPRO   | PTPRO   | PTPRR    | PTPRS    | PTPRT    | PTPRT  | PTPRU   |
| PTPRZ1  | PTTG1IP | PTX3    | PTX4     | PVR      | PVR      | PVRIG  | PXDN    |
| PXK     | PYM1    | PYY     | PZP      | QPCT     | QRF      | QRF    | QRFPR   |
| QRFPR   | QSOX1   | QSOX2   | R3HDML   | RABAC1   | RAET1E   | RAET1E | RAET1G  |
| RAET1G  | RAET1L  | RAMP1   | RAMP2    | RAMP3    | RARRES2  | RBP3   | RBP4    |
| RECK    | RECK    | REEP2   | REEP2    | REG1A    | REG1B    | REG3A  | REG3G   |
| REG4    | RELL1   | RELL2   | RELT     | REN      | RESP18   | RET    | RET     |
| RETN    | RETNLB  | RFTN2   | RGMA     | RGMB     | RGMB     | RGMB   | RGR     |
| RGS9BP  | RHAG    | RHBDD1  | RHBDD2   | RHBDD2   | RHBDF2   | RHBDL2 | RHBG    |
| RHBG    | RHCE    | RHCG    | RHD      | RHD      | RHEB     | RHEX   | RHO     |
| RHO     | RIPOR2  | RLN1    | RLN2     | RLN3     | RNASE1   | RNASE1 | RNASE10 |
| RNASE11 | RNASE12 | RNASE13 | RNASE3   | RNASE4   | RNASE6   | RNASE6 | RNASE7  |
| RNASE8  | RNASE9  | RNASET2 | RNF130   | RNF130   | RNF144A  | RNF150 | RNF150  |
| RNF180  | RNF180  | RNF215  | RNF43    | RNF43    | RNFT2    | RNLS   | RNPEP   |
| RNPEP   | ROBO1   | ROBO2   | ROBO3    | ROBO4    | ROR1     | ROR1   | ROR2    |
| ROS1    | RPSA    | RPTN    | RRAS2    | RRH      | RS1      | RS1    | RSPO1   |
| RSPO2   | RSPO3   | RSPO3   | RSPO4    | RSPRY1   | RTBDN    | RTL8C  | RTN4    |
| RTN4R   | RTN4R   | RTN4R   | RTN4RL1  | RTN4RL2  | RTP1     | RTP1   | RTP2    |
| RXFP1   | RXFP1   | RXFP1   | RXFP2    | RXFP3    | RXFP4    | RXYLT1 | RYK     |
| RYK     | S100A12 | S100A13 | S100A7   | S100A7   | S100A8   | S100A8 | S100A9  |
| S100A9  | S1PR1   | S1PR2   | S1PR3    | S1PR4    | S1PR5    | S1PR5  | S1PR5   |

|          |          |          |          |           |           |           |           |
|----------|----------|----------|----------|-----------|-----------|-----------|-----------|
| SAA1     | SAA2     | SAA4     | SAMD1    | SBSN      | SBSPON    | SCAMP5    | SCAMP5    |
| SCARA3   | SCARA3   | SCARA5   | SCARA5   | SCARB1    | SCARB1    | SCARF1    | SCARF2    |
| SCG2     | SCG3     | SCG5     | SCG5     | SCGB1A1   | SCGB1C1   | SCGB1C2   | SCGB1D1   |
| SCGB1D2  | SCGB1D4  | SCGB2A1  | SCGB2A2  | SCGB2B2   | SCGB3A1   | SCGB3A2   | SCGN      |
| SCGN     | SCIMP    | SCN10A   | SCN1B    | SCN1B     | SCN1B     | SCN1B     | SCN2A     |
| SCN2B    | SCN3A    | SCN3B    | SCN4A    | SCN4B     | SCN4B     | SCN5A     | SCN5A     |
| SCN7A    | SCN9A    | SCNN1A   | SCNN1B   | SCNN1D    | SCNN1D    | SCNN1G    | SCPEP1    |
| SCRG1    | SCRG1    | SCT      | SCT      | SCTR      | SCUBE1    | SCUBE1    | SCUBE2    |
| SCUBE3   | SDC1     | SDC1     | SDC2     | SDC3      | SDC3      | SDC4      | SDC4      |
| SDCBP    | SDCBP    | SDCBP    | SDF2     | SDK1      | SDK2      | SEC23B    | SEC61G    |
| SECTM1   | SECTM1   | SELE     | SELENOK  | SELENOP   | SELENOW   | SELL      | SELL      |
| SELL     | SELP     | SELP     | SELPLG   | SEMA3A    | SEMA3A    | SEMA3B    | SEMA3C    |
| SEMA3C   | SEMA3D   | SEMA3E   | SEMA3F   | SEMA3G    | SEMA4A    | SEMA4B    | SEMA4C    |
| SEMA4D   | SEMA4F   | SEMA4G   | SEMA5A   | SEMA5B    | SEMA6A    | SEMA6B    | SEMA6C    |
| SEMA6D   | SEMA6D   | SEMA7A   | SEMG1    | SEMG2     | SERBP1    | SERBP1    | SERINC1   |
| SERINC3  | SERINC5  | SERP1    | SERPINA1 | SERPINA10 | SERPINA10 | SERPINA11 | SERPINA12 |
| SERPINA3 | SERPINA4 | SERPINA5 | SERPINA5 | SERPINA6  | SERPINA6  | SERPINA7  | SERPINA9  |
| SERPINA9 | SERPINB1 | SERPINB2 | SERPINB2 | SERPINB3  | SERPINB4  | SERPINB5  | SERPINB5  |
| SERPINC1 | SERPINC1 | SERPINE1 | SERPINE1 | SERPINE2  | SERPINE2  | SERPINE3  | SERPINF1  |
| SERPINF2 | SERPING1 | SERPIN2  | SEZ6     | SEZ6L     | SEZ6L2    | SFN       | SFRP1     |
| SFRP2    | SFRP2    | SFRP4    | SFRP4    | SFRP5     | SFTA2     | SFTA3     | SFTPA1    |
| SFTPA2   | SFTPB    | SFTPC    | SFTPC    | SFTPD     | SGCA      | SGCB      | SGCD      |
| SGCD     | SGCD     | SGCE     | SGCG     | SGCZ      | SGCZ      | SGMS2     | SGPP1     |
| SHBG     | SHISA2   | SHISA4   | SHISA5   | SHISA7    | SHISA8    | SHISA9    | SHISAL1   |
| SIAE     | SIDT1    | SIDT2    | SIGIRR   | SIGLEC1   | SIGLEC10  | SIGLEC10  | SIGLEC11  |
| SIGLEC11 | SIGLEC11 | SIGLEC12 | SIGLEC14 | SIGLEC15  | SIGLEC5   | SIGLEC6   | SIGLEC6   |
| SIGLEC6  | SIGLEC7  | SIGLEC8  | SIGLEC9  | SIGLEC9   | SIGLECL1  | SIGMAR1   | SIRPA     |
| SIRPA    | SIRPA    | SIRPB1   | SIRPB1   | SIRPB2    | SIRPD     | SIRPD     | SIRPG     |
| SIT1     | SLAMF1   | SLAMF1   | SLAMF6   | SLAMF7    | SLAMF7    | SLAMF7    | SLAMF7    |
| SLAMF7   | SLAMF7   | SLAMF7   | SLAMF7   | SLAMF7    | SLAMF7    | SLAMF7    | SLAMF7    |
| SLAMF8   | SLAMF9   | SLC10A1  | SLC10A2  | SLC10A4   | SLC10A5   | SLC10A6   | SLC11A1   |
| SLC11A2  | SLC11A2  | SLC12A1  | SLC12A2  | SLC12A3   | SLC12A6   | SLC12A7   | SLC12A8   |
| SLC12A9  | SLC12A9  | SLC13A1  | SLC13A2  | SLC13A2   | SLC13A3   | SLC13A3   | SLC13A4   |
| SLC13A5  | SLC14A1  | SLC14A2  | SLC15A1  | SLC15A2   | SLC15A3   | SLC16A1   | SLC16A1   |
| SLC16A10 | SLC16A10 | SLC16A11 | SLC16A12 | SLC16A13  | SLC16A14  | SLC16A2   | SLC16A3   |
| SLC16A4  | SLC16A4  | SLC16A5  | SLC16A6  | SLC16A7   | SLC16A8   | SLC17A1   | SLC17A3   |
| SLC17A4  | SLC17A5  | SLC17A7  | SLC18A1  | SLC18A2   | SLC18B1   | SLC19A1   | SLC19A1   |
| SLC19A2  | SLC19A3  | SLC1A1   | SLC1A2   | SLC1A3    | SLC1A4    | SLC1A5    | SLC1A6    |
| SLC1A6   | SLC1A7   | SLC1A7   | SLC20A1  | SLC20A2   | SLC22A1   | SLC22A1   | SLC22A10  |
| SLC22A11 | SLC22A12 | SLC22A12 | SLC22A13 | SLC22A13  | SLC22A14  | SLC22A16  | SLC22A17  |
| SLC22A18 | SLC22A2  | SLC22A23 | SLC22A23 | SLC22A24  | SLC22A25  | SLC22A31  | SLC22A4   |
| SLC22A5  | SLC22A6  | SLC22A6  | SLC22A7  | SLC22A8   | SLC22A9   | SLC22A9   | SLC22A9   |
| SLC23A1  | SLC23A1  | SLC23A1  | SLC23A2  | SLC23A2   | SLC23A3   | SLC23A3   | SLC24A1   |
| SLC24A3  | SLC24A4  | SLC24A4  | SLC24A5  | SLC26A1   | SLC26A11  | SLC26A11  | SLC26A2   |
| SLC26A3  | SLC26A4  | SLC26A5  | SLC26A5  | SLC26A5   | SLC26A5   | SLC26A6   | SLC26A7   |

|            |          |          |          |          |          |         |         |
|------------|----------|----------|----------|----------|----------|---------|---------|
| SLC26A8    | SLC26A9  | SLC27A1  | SLC27A2  | SLC27A3  | SLC27A4  | SLC27A5 | SLC27A6 |
| SLC28A1    | SLC28A1  | SLC28A1  | SLC28A2  | SLC28A3  | SLC29A1  | SLC29A2 | SLC29A3 |
| SLC29A4    | SLC2A1   | SLC2A10  | SLC2A11  | SLC2A12  | SLC2A13  | SLC2A13 | SLC2A14 |
| SLC2A2     | SLC2A2   | SLC2A3   | SLC2A4   | SLC2A5   | SLC2A5   | SLC2A6  | SLC2A7  |
| SLC2A8     | SLC2A9   | SLC2A9   | SLC2A9   | SLC30A1  | SLC30A10 | SLC30A5 | SLC30A5 |
| SLC30A7    | SLC30A8  | SLC30A8  | SLC31A1  | SLC31A1  | SLC31A2  | SLC33A1 | SLC34A1 |
| SLC34A2    | SLC34A3  | SLC35D2  | SLC35E3  | SLC35F2  | SLC35G1  | SLC35G2 | SLC36A1 |
| SLC36A1    | SLC36A2  | SLC36A2  | SLC36A3  | SLC36A3  | SLC36A4  | SLC38A1 | SLC38A2 |
| SLC38A3    | SLC38A4  | SLC38A5  | SLC38A6  | SLC38A6  | SLC38A7  | SLC38A7 | SLC38A8 |
| SLC39A1    | SLC39A11 | SLC39A12 | SLC39A14 | SLC39A14 | SLC39A2  | SLC39A3 | SLC39A3 |
| SLC39A4    | SLC39A4  | SLC39A5  | SLC39A5  | SLC39A6  | SLC39A6  | SLC39A6 | SLC39A8 |
| SLC39A8    | SLC39A9  | SLC39A9  | SLC3A1   | SLC3A2   | SLC3A2   | SLC3A2  | SLC3A2  |
| SLC40A1    | SLC40A1  | SLC41A1  | SLC41A2  | SLC41A2  | SLC41A3  | SLC41A3 | SLC43A1 |
| SLC43A2    | SLC43A2  | SLC43A3  | SLC44A1  | SLC44A2  | SLC44A3  | SLC44A3 | SLC44A4 |
| SLC44A4    | SLC44A5  | SLC45A1  | SLC45A2  | SLC45A2  | SLC45A3  | SLC46A1 | SLC46A1 |
| SLC46A2    | SLC46A3  | SLC46A3  | SLC47A1  | SLC47A1  | SLC47A2  | SLC4A1  | SLC4A10 |
| SLC4A11    | SLC4A2   | SLC4A2   | SLC4A2   | SLC4A4   | SLC4A5   | SLC4A7  | SLC4A8  |
| SLC4A8     | SLC50A1  | SLC50A1  | SLC51A   | SLC51A   | SLC51B   | SLC51B  | SLC52A1 |
| SLC52A2    | SLC52A3  | SLC5A1   | SLC5A1   | SLC5A10  | SLC5A10  | SLC5A11 | SLC5A12 |
| SLC5A12    | SLC5A2   | SLC5A3   | SLC5A4   | SLC5A5   | SLC5A6   | SLC5A7  | SLC5A8  |
| SLC5A9     | SLC6A1   | SLC6A11  | SLC6A11  | SLC6A12  | SLC6A13  | SLC6A13 | SLC6A14 |
| SLC6A15    | SLC6A15  | SLC6A15  | SLC6A16  | SLC6A16  | SLC6A17  | SLC6A18 | SLC6A19 |
| SLC6A2     | SLC6A20  | SLC6A3   | SLC6A4   | SLC6A5   | SLC6A6   | SLC6A6  | SLC6A7  |
| SLC6A7     | SLC6A8   | SLC6A9   | SLC7A1   | SLC7A10  | SLC7A11  | SLC7A13 | SLC7A2  |
| SLC7A2     | SLC7A3   | SLC7A4   | SLC7A5   | SLC7A6   | SLC7A7   | SLC7A8  | SLC7A8  |
| SLC7A9     | SLC8A1   | SLC8A2   | SLC8A3   | SLC8A3   | SLC8B1   | SLC9A1  | SLC9A1  |
| SLC9A2     | SLC9A3   | SLC9A3R1 | SLC9A4   | SLC9A5   | SLC9A6   | SLC9A6  | SLC9A7  |
| SLC9B1     | SLC9B2   | SLCO1A2  | SLCO1A2  | SLCO1A2  | SLCO1B1  | SLCO1B3 | SLCO1B7 |
| SLCO1C1    | SLCO2A1  | SLCO2B1  | SLCO3A1  | SLCO3A1  | SLCO4A1  | SLCO4C1 | SLCO5A1 |
| SLCO5A1    | SLCO6A1  | SLCO6A1  | SLIT1    | SLIT2    | SLIT3    | SLITRK1 | SLITRK1 |
| SLITRK2    | SLITRK3  | SLITRK4  | SLITRK5  | SLITRK6  | SLMAP    | SLPI    | SLURP1  |
| SLURP2     | SMAGP    | SMIM1    | SMIM23   | SMIM29   | SMIM7    | SMIM9   | SMO     |
| SMOC1      | SMOC2    | SMPD1    | SMPD1    | SMPD2    | SMPD3    | SMPDL3A | SMPDL3B |
| SMR3A      | SMR3B    | SNAP23   | SNCA     | SNCA     | SNED1    | SNORC   | SOD3    |
| SORBS1     | SORBS1   | SORCS2   | SORD     | SORD     | SORL1    | SORT1   | SOST    |
| SOSTDC1    | SPA17    | SPACA1   | SPACA3   | SPACA4   | SPACA5   | SPACA6  | SPACA7  |
| SPAG11B    | SPAM1    | SPAM1    | SPARC    | SPARCL1  | SPATA20  | SPATA6  | SPCS1   |
| SPG11      | SPG11    | SPINK1   | SPINK13  | SPINK14  | SPINK2   | SPINK2  | SPINK4  |
| SPINK5     | SPINK6   | SPINK7   | SPINK8   | SPINK9   | SPINT1   | SPINT1  | SPINT1  |
| SPINT2     | SPINT3   | SPINT4   | SPN      | SPNS2    | SPNS3    | SPOCK1  | SPOCK2  |
| SPOCK3     | SPON1    | SPON2    | SPP1     | SPPL2B   | SPRED1   | SPRN    | SPX     |
| SRGN       | SRGN     | SRI      | SRPX     | SRPX2    | SSC4D    | SSC5D   | SSPN    |
| SSPN       | SST      | SSTR1    | SSTR1    | SSTR2    | SSTR3    | SSTR4   | SSTR5   |
| ST14       | ST3GAL1  | ST3GAL1  | ST3GAL2  | ST3GAL3  | ST3GAL4  | ST6GAL1 | ST6GAL1 |
| ST6GALNAC6 | ST7      | STAB2    | STARD3   | STARD3   | STARD3NL | STATH   | STBD1   |

|           |           |           |           |           |           |           |           |
|-----------|-----------|-----------|-----------|-----------|-----------|-----------|-----------|
| STC1      | STC2      | STEAP1    | STEAP1B   | STEAP2    | STEAP4    | STEAP4    | STIM1     |
| STIM2     | STING1    | STOM      | STOML1    | STOML3    | STRA6     | STX1A     | STX1A     |
| STX3      | STX4      | STXBP3    | STYK1     | SUCNR1    | SULF1     | SUSD1     | SUSD1     |
| SUSD2     | SUSD3     | SUSD4     | SUSD4     | SUSD4     | SUSD5     | SUSD6     | SV2A      |
| SV2A      | SV2B      | SV2C      | SVBP      | SYNDIG1   | SYNDIG1   | SYNDIG1L  | SYNGR2    |
| SYNGR4    | SYT14     | SYT14     | SYT15     | SYT15     | SYT3      | SYT6      | SYT7      |
| SYT8      | TAAR1     | TAAR2     | TAAR2     | TAAR3P    | TAAR5     | TAAR6     | TAAR8     |
| TAAR9     | TAC1      | TAC1      | TAC3      | TAC4      | TACR1     | TACR1     | TACR2     |
| TACR3     | TACSTD2   | TAFA1     | TAFA2     | TAFA3     | TAFA4     | TAFA5     | TAGLN2    |
| TAOK3     | TAPBPL    | TAPT1     | TARM1     | TAS1R1    | TAS1R1    | TAS1R2    | TAS1R3    |
| TAS2R1    | TAS2R10   | TAS2R13   | TAS2R14   | TAS2R16   | TAS2R19   | TAS2R20   | TAS2R20   |
| TAS2R3    | TAS2R30   | TAS2R31   | TAS2R38   | TAS2R39   | TAS2R4    | TAS2R40   | TAS2R41   |
| TAS2R42   | TAS2R43   | TAS2R45   | TAS2R46   | TAS2R5    | TAS2R50   | TAS2R60   | TAS2R7    |
| TAS2R7    | TAS2R8    | TAS2R9    | TBXA2R    | TCN1      | TCN2      | TCTA      | TCTN1     |
| TCTN2     | TCTN2     | TCTN3     | TDGF1     | TDGF1     | TECTA     | TECTB     | TECTB     |
| TEK       | TEK       | TEK       | TENM1     | TEPP      | TEX101    | TEX101    | TEX264    |
| TEX29     | TF        | TF        | TFF1      | TFF2      | TFF3      | TFPI      | TFPI      |
| TFPI      | TFPI2     | TFPI2     | TFR2      | TFR2      | TFRC      | TFRC      | TG        |
| TGFA      | TGFA      | TGFA      | TGFB1     | TGFB2     | TGFB3     | TGFB1     | TGFB1     |
| TGFBR1    | TGFBR1    | TGFBR2    | TGFBR2    | TGFBR3    | TGFBR3    | TGFBR3L   | TGM2      |
| TGM2      | TGOLN2    | TGOLN2    | THBD      | THBS1     | THBS4     | THEM6     | THNSL2    |
| THOP1     | THPO      | THSD1     | THSD4     | THSD7A    | THY1      | THY1      | TICAM2    |
| TIE1      | TIGIT     | TIMD4     | TIMP1     | TIMP2     | TIMP3     | TIMP4     | TINAG     |
| TINAGL1   | TIRAP     | TLCD1     | TLCD2     | TLCD3A    | TLL1      | TLR1      | TLR10     |
| TLR2      | TLR3      | TLR4      | TLR5      | TLR6      | TLR6      | TLR7      | TLR8      |
| TLR9      | TM2D1     | TM4SF1    | TM4SF1    | TM4SF18   | TM4SF19   | TM4SF4    | TM4SF5    |
|           |           | TM7SF3    | TM9SF2    | TMC1      | TMC2      | TMC3      | TMC4      |
| TMC4      | TMC5      | TMC5      | TMC7      | TMDD1     | TMED1     | TMED10    | TMEFF1    |
| TMEFF2    | TMEFF2    | TMEM100   | TMEM102   | TMEM106A  | TMEM108   | TMEM114   | TMEM117   |
| TMEM119   | TMEM120A  | TMEM123   | TMEM127   | TMEM132A  | TMEM132B  | TMEM132C  | TMEM132D  |
| TMEM132E  | TMEM134   | TMEM139   | TMEM140   | TMEM147   | TMEM150A  | TMEM150A  | TMEM150A  |
| TMEM150B  | TMEM150C  | TMEM154   | TMEM155   | TMEM156   | TMEM161A  | TMEM163   | TMEM167A  |
| TMEM167B  | TMEM169   | TMEM17    | TMEM170B  | TMEM178A  | TMEM182   | TMEM182   | TMEM184A  |
| TMEM184B  | TMEM190   | TMEM198   | TMEM198   | TMEM200A  | TMEM200C  | TMEM204   | TMEM205   |
| TMEM210   | TMEM213   | TMEM219   | TMEM222   | TMEM222   | TMEM222   | TMEM229B  | TMEM231   |
| TMEM233   | TMEM238   | TMEM240   | TMEM241   | TMEM25    | TMEM25    | TMEM25    | TMEM256   |
| TMEM266   | TMEM273   | TMEM30A   | TMEM30B   | TMEM39A   | TMEM39A   | TMEM44    | TMEM44    |
| TMEM47    | TMEM50A   | TMEM59    | TMEM63A   | TMEM63B   | TMEM63C   | TMEM65    | TMEM67    |
| TMEM79    | TMEM79    | TMEM81    | TMEM86A   | TMEM86B   | TMEM86B   | TMEM88    | TMEM89    |
| TMEM8B    | TMEM8B    | TMEM9     | TMEM91    | TMEM92    | TMEM95    | TMEM97    | TMEM97    |
| TMEM98    | TMIE      | TMIGD1    | TMIGD2    | TMIGD3    | TMPRSS11A | TMPRSS11A | TMPRSS11B |
| TMPRSS11D | TMPRSS11D | TMPRSS11E | TMPRSS11E | TMPRSS11F | TMPRSS12  | TMPRSS13  | TMPRSS15  |
| TMPRSS2   | TMPRSS2   | TMPRSS3   | TMPRSS3   | TMPRSS4   | TMPRSS4   | TMPRSS5   | TMPRSS6   |
| TMPRSS6   | TMPRSS7   | TMPRSS7   | TMPRSS9   | TMUB1     | TMX1      | TMX2      | TMX2      |
| TNC       | TNF       | TNF       | TNFRSF10A | TNFRSF10B | TNFRSF10C | TNFRSF10D | TNFRSF11A |

|           |           |           |           |           |          |          |          |
|-----------|-----------|-----------|-----------|-----------|----------|----------|----------|
| TNFRSF11B | TNFRSF12A | TNFRSF13B | TNFRSF13B | TNFRSF13C | TNFRSF14 | TNFRSF14 | TNFRSF17 |
| TNFRSF18  | TNFRSF18  | TNFRSF18  | TNFRSF18  | TNFRSF19  | TNFRSF19 | TNFRSF1A | TNFRSF1A |
| TNFRSF1B  | TNFRSF1B  | TNFRSF1B  | TNFRSF21  | TNFRSF25  | TNFRSF25 | TNFRSF25 | TNFRSF25 |
| TNFRSF25  | TNFRSF25  | TNFRSF25  | TNFRSF4   | TNFRSF6B  | TNFRSF6B | TNFRSF8  | TNFRSF9  |
| TNFSF10   | TNFSF11   | TNFSF11   | TNFSF11   | TNFSF12   | TNFSF12  | TNFSF12  | TNFSF13  |
| TNFSF13   | TNFSF13B  | TNFSF13B  | TNFSF14   | TNFSF14   | TNFSF15  | TNFSF15  | TNFSF18  |
| TNFSF18   | TNFSF4    | TNFSF8    | TNFSF9    | TNMD      | TNN      | TOR2A    | TP53I11  |
| TP53I13   | TPBG      | TPBGL     | TPCN1     | TPCN1     | TPCN2    | TPO      | TPSAB1   |
| TPSB2     | TPSB2     | TPSD1     | TRABD2A   | TRABD2A   | TRABD2B  | TRAF3IP3 | TRAF3IP3 |
| TRARG1    | TRAT1     | TRAT1     | TRAV20    | TRBC1     | TRBC2    | TRDV1    | TRDV2    |
| TRDV2     | TREH      | TREH      | TREM1     | TREM1     | TREM2    | TREM2    | TREM2    |
| TREML1    | TREML2    | TREML2    | TREML4    | TRGV9     | TRH      | TRHDE    | TRHR     |
| TRIL      | TRIM72    | TRO       | TRPA1     | TRPC1     | TRPC4    | TRPC5    | TRPC6    |
| TRPC7     | TRPM2     | TRPM3     | TRPM4     | TRPM5     | TRPM6    | TRPM7    | TRPM8    |
| TRPV1     | TRPV2     | TRPV3     | TRPV4     | TRPV4     | TRPV5    | TRPV5    | TRPV6    |
| TSHB      | TSHR      | TSKU      | TSLP      | TSPAN1    | TSPAN10  | TSPAN11  | TSPAN12  |
| TSPAN13   | TSPAN14   | TSPAN14   | TSPAN15   | TSPAN16   | TSPAN17  | TSPAN18  | TSPAN19  |
| TSPAN2    | TSPAN3    | TSPAN31   | TSPAN32   | TSPAN32   | TSPAN33  | TSPAN33  | TSPAN4   |
| TSPAN4    | TSPAN5    | TSPAN6    | TSPAN7    | TSPAN8    | TSPAN9   | TSPEAR   | TTR      |
| TTYH1     | TTYH1     | TTYH2     | TTYH2     | TTYH3     | TTYH3    | TUB      | TUFT1    |
| TULP1     | TULP2     | TULP3     | TWSG1     | TXN       | TXNDC15  | TXNDC16  | TYRO3    |
| TYROBP    | TYROBP    | UBAC1     | UBE2B     | UBL3      | UCMA     | UCMA     | UCN      |
| UCN2      | UCN3      | UGT2A1    | UGT2A3    | UGT3A1    | UGT3A1   | UGT3A2   | ULBP1    |
| ULBP2     | ULBP2     | ULBP3     | UMOD      | UMOD      | UMODL1   | UNC5A    | UNC5B    |
| UNC5C     | UNC5CL    | UNC5D     | UNC93A    | UPK1A     | UPK1B    | UPK2     | UPK3A    |
| UPK3B     | UPK3B     | UPK3BL1   | UPK3BL1   | UTS2      | UTS2     | UTS2B    | UTS2R    |
| VAMP2     | VAMP5     | VAMP8     | VANGL1    | VANGL2    | VAPA     | VASH1    | VASH2    |
| VASN      | VASN      | VASP      | VCAM1     | VCL       | VDAC1    | VEGFA    | VEGFA    |
| VEGFA     | VEGFB     | VEGFC     | VEGFD     | VGf       | VIP      | VIPR1    | VIPR1    |
| VIPR2     | VIPR2     | VIT       | VLDLR     | VLDLR     | VMO1     | VMP1     | VMP1     |
| VN1R1     | VN1R2     | VN1R3     | VN1R3     | VN1R4     | VN1R5    | VNN1     | VNN2     |
| VNN3      | VOPP1     | VPREB1    | VSIG1     | VSIG10    | VSIG2    | VSIG4    | VSIG8    |
| VSIR      | VSTM1     | VSTM1     | VSTM1     | VSTM2A    | VSTM2B   | VSTM4    | VSTM5    |
| VTCN1     | VTCN1     | VTCN1     | VTIIA     | VTN       | VWA1     | VWA2     | VWA3A    |
| VWA5B1    | VWA7      | VWC2      | VWC2L     | VWCE      | VWDE     | VWF      | WFDC1    |
| WFDC10A   | WFDC10B   | WFDC11    | WFDC11    | WFDC12    | WFDC13   | WFDC2    | WFDC3    |
| WFDC5     | WFDC6     | WFDC8     | WFDC9     | WFDC9     | WFIKKN1  | WFIKKN2  | WIF1     |
| WLS       | WNT1      | WNT10A    | WNT10B    | WNT11     | WNT16    | WNT2     | WNT2     |
| WNT2B     | WNT3      | WNT3A     | WNT3A     | WNT4      | WNT4     | WNT5A    | WNT5A    |
| WNT5B     | WNT5B     | WNT6      | WNT7A     | WNT7A     | WNT7B    | WNT7B    | WNT8A    |
| WNT8B     | WNT9A     | WNT9A     | WNT9B     | WNT9B     | WWP1     | XCL1     | XCL1     |
| XCL2      | XCR1      | XG        | XG        | XK        | XKR3     | XKR4     | XKR8     |
| XKRX      | XPNPEP2   | XPR1      | XYLT1     | XYLT2     | YBX1     | YIF1B    | YIF1B    |
| YIPF3     | YKT6      | ZACN      | ZACN      | ZDHHC17   | ZDHHC2   | ZDHHC20  | ZDHHC3   |
| ZDHHC4    | ZDHHC5    | ZDHHC5    | ZFYVE27   | ZG16      | ZG16     | ZG16B    | ZMYND19  |

|                                 |                        |                          |                        |                   |                   |                        |                        |
|---------------------------------|------------------------|--------------------------|------------------------|-------------------|-------------------|------------------------|------------------------|
| ZNRF3                           | ZP1                    | ZP1                      | ZP2                    | ZP2               | ZP3               | ZP3                    | ZP3                    |
| ZP4                             | ZP4                    | ZPBP                     | ZPBP2                  | ZPLD1             | ZPLD1             | ZPLD1                  |                        |
| <b>Heterodimers (396 pairs)</b> |                        |                          |                        |                   |                   |                        |                        |
| ACKR3: CXCR4                    | ACKR4: CXCR3           | ACVR1: TGFBR1            | ACVR1: TGFBR2          | ACVR1: BMPR2      | ACVR1: ACVR2      | ACVR1: ACVR2           | ACVR1: AMHR2           |
| ACVR1B: TGFBR1                  | ACVR1B: TGFBR2         | ACVR1B: BMPR1            | ACVR1B: ACVR1          | ACVR1B: ACVR2     | ACVR1B: AMHR1     | ACVR1B: TGFBR1         | ACVR1B: TGFBR2         |
| ACVR1B: BMPR1                   | ACVR1B: ACVR1          | ACVR1B: ACVR2            | ACVR1B: AMHR1          | ACVR1C: TGFBR1    | ACVR1C: TGFBR2    | ACVR1C: BMPR1          | ACVR1C: ACVR2A         |
| ACVR1C: ACVR1                   | ACVR1C: AMHR1          | ACVRL1: TGFBR1           | ACVRL1: TGFBR2         | ACVRL1: BMPR1     | ACVRL1: ACVR1     | ACVRL1: ACVR2          | ACVRL1: AMHR2          |
| ADIPOR1: ADIPOR2                | ADRA1A: ADRA1B         | AMIGO1: AMIGO2           | AMIGO1: AMIGO3         | AMIGO2: AMIGO3    | AOC2: AOC3        | ASIC1 (1a): ASIC1 (1b) | ASIC1 (1a): ASIC2 (2b) |
| ASIC1 (1a): ASIC1 (1b)          | ASIC1 (1a): ASIC1 (1b) | ASIC1 (1a): ASIC1 (1b)   | ASIC2 (2a): ASIC2 (2b) | ATP1A1: ATP1B1    | ATP1A1: ATP1B1    | ATP1A1: ATP1B1         | ATP1A2: ATP1B1         |
| ATP1A2: ATP1B1                  | ATP1A2: ATP1B1         | ATP1A3: ATP1B1           | ATP1A3: ATP1B1         | ATP1A3: ATP1B1    | ATP4A: ATP4B      | BMPR1A: TGFBR1         | BMPR1A: TGFBR2         |
| BMPR1A: BMPR1B                  | BMPR1A: ACVR1          | BMPR1A: ACVR2            | BMPR1A: AMHR1          | BMPR1B: TGFBR1    | BMPR1B: TGFBR2    | BMPR1B: BMPR1A         | BMPR1B: ACVR2A         |
| BMPR1B: ACVR1                   | BMPR1B: AMHR1          | BSG (Iso 2): BSG (Iso 1) | BSND: CLCNK1           | CD19: CD81        | CD1A: B2M         | CD1B: B2M              | CD1C: B2M              |
| CD1D: B2M                       | CD1E: B2M              | CD22: CD22               | CD22: CD22             | CD3D: CD3E        | CD3G: CD3E        | CD79A: CD79B           | CD8A: CD8B             |
| CD8A: CD8B2                     | CEACAM8: CEACAM8       | CHRNA2: CHRNB4           | CHRNA2: CHRNB4         | CHRNA3: CHRNB4    | CHRNA3: CHRNB4    | CHRNA4: CHRNB4         | CHRNA4: CHRNB4         |
| CHRNA9: CHRNB4                  | CLEC4E: CLEC4E         | CNGA1: CNGB1             | CNGA3: CNGB3           | CNTNAP1: CNTNAP1  | CSF2RA: CSF2RB    | CYBA: CYBB             | DPP6: KCND2            |
| DRD1: DRD2                      | DRD2: DRD4             | DUOX2: DUOX2             | EFNA1: EPHA2           | EGFR: ERBB2       | EGFR: ERBB3       | EGFR: ERBB4            | ENO1: ENO2             |
| ERBB2: ERBB3                    | ERBB2: ERBB4           | ERBB3: ERBB4             | FAP: DPP4              | FCER1G: LILRA1    | FCGR3A: FCER1     | FCGR3A: CD24           | FCGRT: B2M             |
| GABBR1: GABBR2                  | GABBR1: GABBR2         | GFRAL: TGFBR1            | GFRAL: ENG             | GFRAL: CFC1       | GFRAL: TDGF1      | GFRAL: RGMA            | GFRAL: RGMB            |
| GFRAL: HJV                      | GIPR: GLP1R            | GJA3: GJA8               | GJB2: GJB4             | GLRA1: GLRB       | GLRA2: GLRB       | GLRA3: GLRB            | GNB1: GNG2             |
| GPIBA: GPIBB                    | GPIBA: GPIBB           | GPBR1: CRHR1             | GPBR1: HTR1A           | GPBR1: PAQR8      | GPR135: MTNR1     | GPR183: CXCR3          | GPR50: MTNR1A          |
| GPR50: MTNR1                    | GPR61: MTNR1           | GPR62: MTNR1             | GRIK1: GRIK5           | GRIK2: GRIK5      | GRIK3: GRIK5      | GRIK4: GRIK1           | GRIK4: GRIK3           |
| GRIN1: GRIN2A                   | GRIN1: GRIN2B          | GRIN1: GRIN2C            | GRIN1: GRIN2D          | HCN1: HCN2        | HCN1: HCN3        | HCN1: HCN3             | HCN1: HCN4             |
| HCN2: HCN4                      | HLA-A: B2M             | HLA-A: B2M               | HLA-A: B2M             | HLA-B: B2M        | HLA-C: B2M        | HLA-DOA: HLA-DPA1      | HLA-DPA1: HLA-DPB1     |
| HLA-DPA1: HLA-DPB1              | HLA-DQA1: HLA-DQA2     | HLA-DQA2: HLA-DQA1       | HLA-DRA: HLA-DQA1      | HLA-DRA: HLA-DQA1 | HLA-DRA: HLA-DQA1 | HLA-DRA: HLA-DQA1      | HLA-E: B2M             |
| HLA-F: B2M                      | HLA-G: B2M             | HLA-G: B2M               | HLA-H: B2M             | HTR1D: HTR1B      | HTR3B: HTR3A      | HTR3C: HTR3A           | HTR3D: HTR3A           |
| HTR3E: HTR3A                    | IFNAR1: IFNAR2         | IFNGR1: IFNGR2           | IFNLR1: IL10RB         | IL10RA: IL10RB    | IL12RB1: IL12R    | IL17RA: IL17RB         | IL17RA: IL17RC         |
| IL17RA: IL17RB                  | IL17RA: IL17RB         | IL18R1: IL18RA           | IL1R2: IL1RAP          | IL1RL2: IL1RAP    | IL20RA: IL20RB    | IL20RA: IL10RB         | IL21R: IL2RG           |
| IL22RA1: IL10RB                 | IL22RA1: IL20RB        | IL23R: IL12RB1           | IL27RA: IL6ST          | IL2RB: IL2RG      | IL31RA: OSMR      | IL3RA: CSF2RB          | IL4R: IL2RG            |
| IL4R: IL13RA1                   | IL5RA: CSF2RB          | IL6ST: IL6R              | IL6ST: LIFR            | IL6ST: OSMR       | IL7R: IL2RG       | IL7R: CRLF2            | IL9R: IL2RG            |
| INSR: IGF1R                     | ITGA10: ITGB1          | ITGA11: ITGB1            | ITGA2: ITGB1           | ITGA2B: ITGB3     | ITGA3: ITGB1      | ITGA4: ITGB1           | ITGA4: ITGB7           |
| ITGA5: ITGB1                    | ITGA6: ITGB1           | ITGA6: ITGB4             | ITGA7: ITGB1           | ITGA8: ITGB1      | ITGA9: ITGB1      | ITGAD: ITGB2           | ITGAE: ITGB7           |
| ITGAL: ITGB2                    | ITGAM: ITGB2           | ITGAV: ITGB1             | ITGAV: ITGB3           | ITGAV: ITGB5      | ITGAV: ITGB6      | ITGAV: ITGB8           | ITGAX: ITGB2           |
| KCNA1: KCNA2                    | KCNA1: KCNA4           | KCNA1: KCNA5             | KCNA1: KCNA6           | KCNA2: KCNA5      | KCNA2: KCNA5      | KCNA2: KCNA6           | KCNA4: KCNA5           |
| KCNA4: KCNA6                    | KCNA5: KCNA6           | KCNB1: KCNG1             | KCNB1: KCNG2           | KCNB1: KCNG4      | KCNB1: KCNH1      | KCNB1: KCNH2           | KCNB1: KCNS1           |
| KCNB1: KCNS2                    | KCNB1: KCNS3           | KCNB1: KCNV1             | KCND1: KCND2           | KCND2: KCNIP1     | KCNE2: KCNQ1      | KCNH1: KCNH3           | KCNH2: KCNH6           |
| KCNH2: KCNE1                    | KCNH2: KCNE2           | KCNH7: KCNH2             | KCNH7: KCNH6           | KCNJ10: KCNJ1     | KCNJ12: KCNJ4     | KCNJ2: KCNJ4           | KCNJ2: KCNJ16          |
| KCNJ3: KCNJ6                    | KCNJ3: KCNJ9           | KCNJ3: KCNJ5             | KCNJ6: KCNJ5           | KCNK1: KCNK9      | KCNQ2: KCNQ3      | KCNQ4: KCNQ3           | KCNQ5: KCNQ3           |
| KCNQ5: KCNQ                     | KDR: FLT1              | KDR: FLT4                | KEL: XK                | KIRREL3: NPHS1    | KLRC1: KLRD1      | KLRC2: KLRD1           | KLRC2: KLRD1           |
| KLRC3: KLRD1                    | KLRC4: KLRD1           | KLRK1: HCST              | LRFN1: LRFN2           | LRFN1: LRFN3      | LRFN1: LRFN4      | LRFN1: LRFN5           | LRFN2: LRFN3           |
| LRFN2: LRFN4                    | LRFN2: LRFN5           | LRFN3: LRFN4             | LRFN3: LRFN5           | LRFN4: LRFN5      | LTA: LTB          | MCOLN1: MCOLN2         | MCOLN1: MCOLN3         |
| MCOLN3: TRPV1                   | MEP1A: MEP1B           | MOG: MOG                 | MR1: B2M               | MRAP: MRAP2       | NDFIP1: NDFIP2    | NLGN1: NLGN2           | NLGN1: NLGN3           |
| NLGN1: NRXN1                    | NLGN2: NLGN3           | NRP1: NRP2               | NRP1: PLXNA1           | NRP1: PLXNA2      | NRP1: PLXNA4      | NRP1: KDR              | OPRM1: OPRD1           |
| OPRM1: OPRK1                    | OPRM1: OPRL1           | OPRM1: ADRA1A            | OPRM1: SSTR2           | OPRM1: CNR1       | OPRM1: CCR5       | P2RX1: P2RX2           | P2RX1: P2RX3           |
| P2RX1: P2RX4                    | P2RX1: P2RX5           | P2RX1: P2RX6             | P2RX2: P2RX3           | P2RX2: P2RX4      | P2RX2: P2RX5      | P2RX2: P2RX6           | P2RX3: P2RX4           |
| P2RX3: P2RX5                    | P2RX3: P2RX6           | P2RX4: P2RX5             | P2RX4: P2RX6           | P2RX5: P2RX6      | PANX1: PANX2      | PDGFRA: PDGFRB         | PKD1L1: PKD2L1         |

|                 |               |               |                |               |               |               |                     |
|-----------------|---------------|---------------|----------------|---------------|---------------|---------------|---------------------|
| PLXNB1: PLXN    | RAMP1: CALCF  | RAMP2: CALCF  | RAMP3: CALCF   | SCN1B: SCN4A  | SCN1B: SCN5A  | SCN1B: SCN9A  | SCN1B: SCN10A       |
| SCN2B: SCN5A    | SCN2B: SCN9A  | SCN2B: SCN10A | SCN3B: SCN5A   | SCN3B: SCN9A  | SCN3B: SCN10A | SCN4B: SCN5A  | SGCB: SGCD          |
| SLC3A1: SLC7A   | SLC3A2: SLC7A | SLC3A2: SLC7A | SLC3A2: SLC7A  | SLC3A2: SLC7A | SLC3A2: SLC7A | SLC3A2: SLC7A | SLC51A: SLC51B      |
| SSTR2: SSTR3    | SSTR2: SSTR5  | STIM1: STIM2  | TAS1R1: TAS1R  | TAS1R2: TAS1R | TEK: TIE1     | TGFBR1: TGFBR | TGFBR1: TGFBR2      |
| TGFBR1: BMPRI   | TGFBR1: ACVR  | TGFBR1: ACVR  | TGFBR1: AMHR   | TGFBR1: TGFBR | TGFBR1: TGFBR | TGFBR1: BMPRI | TGFBR1: ACVR2A      |
| TGFBR1: ACVR    | TGFBR1: AMHR  | TGFBR1: ENG   | TGFBR2: ENG    | TIGIT: PVR    | TLR2: TLR1    | TLR2: TLR6    | TMPRSS11E: SERPINA5 |
| TMPRSS11E: SERP | TMPRSS7: SERP | TRGV9: TRDV1  | TRGV9: TRDV2   | TRPC1: TRPC4  | TRPC1: TRPC5  | TRPC4: TRPC5  | TRPV1: TRPV3        |
| TRPV5: TRPV6    | UPK1B: UPK3A  | UPK1B: UPK3B  | VANGL1: VANGL2 |               |               |               |                     |
